1 ***LYS3* encodes a prolamin-box-binding transcription factor that controls embryo growth**  
2 **in barley and wheat**

3

4 Beata Orman-Ligeza<sup>a</sup>, Philippa Borrill<sup>b</sup>, Tansy Chia<sup>a</sup>, Marcella Chirico<sup>a</sup>, Jaroslav Doležel<sup>c</sup>,  
5 Sinead Drea<sup>d</sup>, Miroslava Karafiátová<sup>c</sup>, Nicole Schatlowksi<sup>a</sup>, Charles U. Solomon<sup>d,f</sup>, Burkhard  
6 Steuernagel<sup>e</sup>, Brande B. H. Wulff<sup>e</sup>, Cristobal Uauy<sup>e</sup>, Kay Trafford<sup>a</sup>

7

8 <sup>a</sup> NIAB, Genetics and Breeding, Huntington Road, Cambridge, CB3 0LE, UK.

9 <sup>b</sup> School of Biosciences, University of Birmingham, Edgbaston, Birmingham, B15 2TT, UK.

10 <sup>c</sup> Institute of Experimental Botany, Czech Academy of Sciences, Centre of the Region Haná  
11 for Biotechnological and Agricultural Research, Olomouc, Czech Republic.

12 <sup>d</sup> Department of Genetics, University of Leicester, Adrian Building, University Road,  
13 Leicester, LE1 7RH, UK.

14 <sup>e</sup> John Innes Centre, Norwich Research Park, Norwich, NR4 7UH, UK.

15 <sup>f</sup> Department of Plant Science and Biotechnology, Abia State University, PMB 2000, Uturu,  
16 Nigeria.

17

18 Present addresses:

19 Nicole Schatlowksi: Wellcome Genome Campus, Hinxton, CB10 1SA, UK

20

21 \*Corresponding author. Kay Trafford, The National Institute of Agricultural Botany,

22 Huntingdon Road, Cambridge, Cambridgeshire CB3 0LE, UK. Email address:

23 [kay.trafford@niab.com](mailto:kay.trafford@niab.com). Tel +44 (0)1223 34249.

24

25 **Keywords:** high lysine, PBF, large embryo, shrunken endosperm.

26 *Abbreviations:* Days after flowering (DAF), DNA binding with one zinc finger (DOF),  
27 prolamins-box binding factor (PBF), targeting induced local lesions in genomes (TILLING),  
28 sorting intolerant from tolerant (SIFT).

29

30 *Declarations of interest:* none

31 *Number of words:* 5428

32 *Number of Tables:* 1

33 *Number of Figures:* 5

34 *Number of supplementary Tables:* 4

35 *Number of supplementary Figures:* 2

36

## 37 **HIGHLIGHTS**

- 38 • *LYS3* encodes a transcription factor called Prolamin Binding Factor (PBF) that is  
39 expressed in grains only.
- 40 • Wheat and barley *LYS3/PBF* mutants have enlarged embryos suggesting that this gene  
41 suppresses embryo growth.
- 42 • The down-stream target genes of *PBF* in wheat are predicted to be involved in a wide  
43 range of biological processes including organ development and starch metabolism.

44 **ABSTRACT**

45 Mutations at the *LYS3* locus in barley have multiple effects on grain development, including  
46 an increase in embryo size and a decrease in endosperm starch content. The gene underlying  
47 *LYS3* was identified by genetic mapping and mutations in this gene were identified in all four  
48 barley *lys3* alleles. *LYS3* encodes a transcription factor called Prolamin Binding Factor (PBF).  
49 Its role in controlling embryo size was confirmed using wheat TILLING mutants. To  
50 understand how *PBF* controls embryo development, we studied its spatial and temporal  
51 patterns of expression in developing grains. The *PBF* gene is expressed in both the  
52 endosperm and the embryos, but the timing of expression in these organs differs. *PBF*  
53 expression in wild-type embryos precedes the onset of embryo enlargement in *lys3* mutants,  
54 suggesting that *PBF* suppresses embryo growth. We predicted the down-stream target genes  
55 of *PBF* in wheat and found them to be involved in a wide range of biological processes,  
56 including organ development and starch metabolism. Our work suggests that *PBF* may  
57 influence embryo size and endosperm starch synthesis via separate gene control networks.

## 58 A. Introduction

59 In the 1960-70s, in an attempt to improve the lysine content of barley (*Hordeum vulgare*  
60 L.) for animal feed, mutagenized barley germplasm at the Risø National Laboratory,  
61 Denmark, was screened for lysine content and a number of high-lysine (*lys*) mutants were  
62 identified (Doll *et al.*, 1974; Doll, 1976). The *lys* mutant with the highest lysine content (44  
63 percent higher than wild type) was Risø1508 (*lys3a*) (Ingversen *et al.*, 1973; Mossberg,  
64 1969). In addition to *lys3a*, there are three other barley lines with mutations at the same locus:  
65 Risø18 (*lys3b*), Risø19 (*lys3c*) and M1460 (*lys3d*) (Aastrup, 1983; Munck, 1992)  
66 (Supplementary Table S1). All four *lys3* mutations are recessive.

67 Studies have shown that the endosperm of *lys3* mutants, like that of most other high-lysine  
68 barley mutants, contains less starch and lysine-poor protein (hordein), but has more lysine-  
69 rich protein and free lysine (Brandt, 1976; Ingversen *et al.*, 1973). However, uniquely  
70 amongst high-lysine barley mutants, the embryos of all four *lys3* mutants are larger than  
71 normal (Tallberg, 1977, Deggerdal *et al.*, 1986, Cook *et al.*, 2018). Most of the barley *lys*  
72 mutants, including those known to have lesions in genes encoding components of the starch  
73 biosynthesis pathway (Trafford and Fincher, 2014), have reduced embryo weight (as well as  
74 shrivelled-endosperm and reduced starch content; Cook *et al.*, 2018). The enlargement of the  
75 embryos in *lys3* mutants is therefore a specific response to mutation at the *LYS3* locus and not  
76 due to the diversion of resources from the shrivelled endosperm to the embryo. As well as  
77 increased size, the embryos of *lys3* mutants have higher-than-normal starch content  
78 (Deggerdal *et al.*, 1986; Olsen *et al.*, 1984) and larger-than-normal cells in the scutellum  
79 (Olsen *et al.*, 1984; Deggerdal *et al.*, 1986). The mutant embryos also show reduced  
80 dormancy (Cook *et al.*, 2018).

81 Risø1508 (*lys3a*) has been the subject of a breeding programme to improve the nutritional  
82 quality of barley, particularly for pig feed (Munck and Jespersen, 2009). Animal feeding

83 trials, using the Risø1508-derived lines Piggy and Lysimax, showed that *lys3a* mutant lines  
84 are a more effective source of protein for maximum growth rate in pigs than the wild-type  
85 barley varieties from which they are derived (Munck, 1972; Mortensen *et al.*, 1988; Gabert *et*  
86 *al.*, 1995; Gabert *et al.*, 1996). However, the success of Risø1508-derived barley lines as  
87 animal feed is hampered by their reduced starch content which leads to low grain weight and  
88 consequently to low yield.

89 To separate the favourable (nutritional enhancements) and unfavourable (yield  
90 depression) traits associated with *lys3* mutations, it is necessary to identify the gene  
91 responsible and then to understand how it functions in developing embryos and endosperm.  
92 We report here the identification of the *LYS3* gene by genetic mapping using embryo size as  
93 the selection phenotype. Whilst our work on this was in progress, the gene underlying the  
94 *LYS3* locus was independently identified by Moehs *et al.* (2019) using variation in hordein  
95 content as the selection phenotype. Both studies agree that *LYS3* encodes a previously-  
96 identified and well-studied transcription factor in barley: prolamin-box binding factor (PBF).  
97 To understand PBF function, we studied its gene expression patterns in barley and found that  
98 contrary to previous reports (Mena *et al.*, 1998; Mena *et al.*, 2002), *PBF* is expressed in  
99 developing embryos as well as in the endosperm. The emphasis of our current work is to  
100 identify the down-stream target genes of PBF and here we present our initial studies of its  
101 predicted targets in wheat.

## 102 2. Materials and methods

### 103 2.1. Barley germplasm

104 Grains of Bomi, Morex and Risø1508 were obtained from the Germplasm Resources Unit,  
105 John Innes Centre, Norwich, UK and Risø18, Risø19, M1460 and Minerva were kindly  
106 supplied by Birthe Møller Jespersen, University of Copenhagen, Denmark.

107

### 108 2.2. Plant growth

109 For mapping experiments, individual grains were germinated in Petri dishes on moist filter  
110 paper. After over-night incubation at 4 °C, plates were transferred to room temperature.  
111 When roots and shoots were established, each seedling was transplanted into a 1 L pot  
112 containing Levington M2 compost (Scotts Professional, Ipswich, UK) and grown in a  
113 glasshouse. In winter, additional lighting was provided by sodium lamps for 16 h per day and  
114 temperatures were maintained between 15 °C (night) and 20 °C (day). In summer, plants  
115 were grown in a glasshouse under ambient conditions.

116 Wheat TILLING mutants were sown directly into M2 compost, incubated at 4 °C for 3  
117 days and then transferred to a glasshouse with a 22-hour photoperiod and temperatures of 21  
118 °C (night) and 18 °C (day). Supplementary lighting was provided by a mixture of high-  
119 pressure sodium lamps and both far red and white LED lights (Conviron, Winnipeg, US).

120

### 121 2.3. Analysis of grain and embryo development

122 Anthesis occurred whilst the ear was enveloped in the flag leaf so the exact day of anthesis  
123 was difficult to determine without damaging the developing spike. Accordingly, flowering  
124 time was defined as the day on which the awns of the developing ear protruded more than 1  
125 cm above the leaf sheath and grain/embryo age was measured in days after flowering (DAF).

126

127 2.4. DNA extraction

128 For barley genotyping, DNA was extracted as follows: leaf material was harvested at seedling  
129 stage to 1.5-ml tubes each containing a 5-mm diameter steel ball and frozen at -80 °C. Frozen  
130 leaf material was homogenised using a Geno/Grinder (SPEX SamplePrep LLC) and then  
131 600 µl of extraction buffer (200 mM Tris pH 7.5, 250 mM NaCl, 25 mM EDTA, 0.5% [w/v]  
132 SDS) was added. The homogenized leaf material was incubated at 65 °C for one hour. Leaf  
133 debris was pelleted by centrifugation and the supernatant was transferred to a fresh 1.5-ml  
134 tube, mixed with an equal volume of isopropanol and centrifuged. The pellet was washed  
135 with 500 µl 70% [v/v] ethanol and resuspended in 200 µl H<sub>2</sub>O. DNA was quantified using a  
136 spectrometer (NanoDrop 1000, Thermo Scientific) and the concentration adjusted to  
137 10 ng/µl.

138 For wheat genotyping, DNA was extracted from seedling leaf material using the method  
139 of Fulton *et al.* (1995).

140

141 2.5. Chromosome sequencing

142 For each barley line, suspensions of intact mitotic metaphase chromosomes were prepared  
143 from synchronized root tip cells of barley seedlings as described by Lysák *et al.* (1999).  
144 Chromosomes in suspension were stained with 2 µg.ml<sup>-1</sup> DAPI (4', 6-diamidino-2-  
145 phenylindole) and chromosome 5H was sorted using a FACS Aria II SORP flow cytometer  
146 and sorter (Becton Dickinson Immunocytometry Systems, San José, USA). Purity in the  
147 sorted 5H fractions was determined microscopically after FISH with a probe for GAA  
148 microsatellite (Kubaláková *et al.*, 2003). DNA of the sorted chromosomes was purified and  
149 amplified by multiple displacement amplification according to Šimková *et al.* (2008). Three  
150 independent amplification products were combined in each cultivar to reduce amplification  
151 bias.

152

153 The samples of pooled amplified chromosomal DNA were subjected to Illumina HiSeq2500  
154 sequencing (The Genome Analysis Centre, Norwich, UK; now the Earlham Institute). Paired-  
155 end read size was 250 bp for the wild-type samples and 125 bp for the mutant samples. The  
156 total number of paired-reads obtained was 172,974,201 (Bomi), 252,692,421 (Risø1508) and  
157 226,936,729 (Risø19). Data were submitted to the European Nucleotide Archive  
158 ([www.ebi.ac.uk](http://www.ebi.ac.uk)) with accession number PRJEB33709.

159

### 160 *2.6. Genotyping the mapping population*

161 The Bomi chromosome sequencing data was assembled using the published Morex genome  
162 sequence (as described below for MutChromSeq). Genes flanking the *LYS3* locus with SNPs  
163 between Bomi and Morex were selected for KASP marker design. For primer sequences see  
164 Supplementary Table S2A. Genotyping was performed on a Quant Studio 7 (Applied  
165 Biosystems) using KASP technology (LGC) following the manufacturers' instructions.

166

### 167 *2.7. Determination of embryo size*

168 For fine mapping in barley, the embryo phenotype of recombinant lines was visually  
169 determined and categorized as normal or large embryo. For determination of relative embryo  
170 dry weight, all barley or wheat plants for each experiment were grown together in one batch  
171 and grains were harvested at maturity. To extract the embryos, grains were soaked overnight  
172 in sterile water at 4 °C in the dark and then dissected into embryo and non-embryo portions.  
173 Both portions were dried to constant weight by heating in an oven at 65 °C for 3 days.

174 Relative embryo weight (%) = (embryo dry weight / (embryo + non-embryo dry weight)) x  
175 100.

176



177 2.8. *Identification of a candidate gene using MutChromSeq*

178 The chromosome sequencing data was analysed using the MutChromSeq pipeline according  
179 to Steuernagel *et al.* (2017). The raw data were trimmed using sickle  
180 (<https://github.com/najoshi/sickle>) with default parameters. Trimmed data from wild types  
181 Bomi and Minerva were assembled using CLC Assembly Cell  
182 (<https://www.qiagenbioinformatics.com/products/clc-assembly-cell/>), version 5.1 with default  
183 parameters. Trimmed data from mutants and wild types were mapped to wild-type assemblies  
184 using bwa sampe (Li and Durbin, 2009), version 0.7.12 with default parameters. Further  
185 processing of mappings was done using samtools (Li *et al.*, 2009) version 0.1.19. For running  
186 MutChromSeq, we used release 2 (<https://github.com/steuernb/MutChromSeq/releases/tag/2>),  
187 which introduces the filtering of contigs using a mapping interval, as described in Dracatos *et*  
188 *al.* (2019). These sequences and those of the wild-type controls have been submitted to  
189 GenBank (accession numbers: MN715383, MN715384, MN715385, MN715386,  
190 MN715387).

191

192 2.9. *Analysis of barley PBF/LYS3 genes*

193 The SNP mutations in the *PBF/LYS3* genes that were identified by chromosome sequencing  
194 were confirmed by PCR amplification and Sanger sequencing. The primer sequences and  
195 PCR conditions are given in Supplementary Table S2B. Mutations in the mapping lines were  
196 confirmed using KASP assays (Supplementary Table S2C).

197

198 2.10. *Large-embryo TILLING mutants of wheat*

199 Lines of the hexaploid wheat cultivar Cadenza were selected from the *in silico* wheat  
200 TILLING resource ([www.wheat-tilling.com](http://www.wheat-tilling.com); Krasileva *et al.*, 2017) (Supplementary Table  
201 S2D). The supplied seed was sown, pairs of homozygous mutant lines were selected and

202 cross-pollinated, and the resulting F<sub>1</sub> plants were confirmed to be heterozygous. A  
203 homozygous triple mutant was constructed by crossing Cadenza0903 (*TaPBF-B1*) to  
204 Cadenza0904 (*TaPBF-D1*) and homozygous F<sub>2</sub> double mutants were then crossed to  
205 Cadenza1807 or Cadenza1553 (*TaPBF-A1* mutants).

206

### 207 *2.11. Analysis of expression by Reverse Transcription PCR*

208 Tissue was harvested, weighed, frozen in liquid nitrogen and stored at -20 °C. Total RNA was  
209 extracted using Tri Reagent (Sigma Aldrich, UK) according to the manufacturer's  
210 instructions, its concentration was measured with a spectrometer (NanoDrop 1000, Thermo  
211 Scientific) and it was stored at -80 °C. An aliquot containing 4 µg RNA was treated for 45  
212 min with 2 µl of DNase RQ1 (1 µg/µl) at 37 °C (Promega, UK), and purified using an  
213 RNAeasy spin column (Qiagen, UK). cDNA was prepared from 0.5 µg RNA using a  
214 SuperScript III reverse transcriptase kit and oligo(dT)18 primers (Thermo Fisher Scientific,  
215 UK) according to the manufacturer's instructions and stored at -20 °C prior to PCR. The  
216 primer sequences and PCR conditions are given in Supplementary Table S2E.

217

### 218 *2.12. Analysis of expression by in situ hybridization*

219 Developing barley grains were harvested and processed for mRNA *in situ* hybridization as  
220 described in Drea *et al.*, (2005) and Opanowicz *et al.*, (2010). The probe template consisted  
221 of a *PBF* cDNA fragment amplified with gene-specific primers from a barley grain cDNA  
222 library (primer sequences are given in Supplementary Table S2F). For amplification of the  
223 antisense probe, a T7 polymerase promoter sequence was attached to the 3' end of the reverse  
224 primer. For amplification of the sense probe, a T7 promoter sequence was attached to the 5'  
225 end of the forward primer. The amplified products were transcribed *in vitro* with T7 RNA  
226 polymerase (Bioline, UK).

227

228 *2.13. Downstream targets of wheat PBF*

229 The promotor regions (-2 kb) of 29 wheat starch biosynthesis genes were searched for  
230 sequences conforming to the consensus prolamin and pyrimidine binding sequences  
231 (TGTAAG and CCTTTT, respectively). The predicted TaPBF downstream target genes  
232 were investigated using the RefSeqv1.0 wheat genome assembly and associated wheat gene  
233 networks. One network (referred to as the GENIE3 network) had been constructed to predict  
234 transcription factor targets using 850 RNA-seq samples (Ramírez-González *et al.* (2018) and  
235 four separate co-expression (Weight Gene Correlation Network Analysis, WGCNA)  
236 networks for grain, leaf, root and spike tissues were used to identify co-expressed genes  
237 (Ramírez-González *et al.*, 2018). Gene ontology term enrichment analysis was performed as  
238 described in Ramírez-González *et al.* (2018) using Goseq (Young *et al.*, 2010).

### 239 3. Results

#### 240 3.1. Fine mapping *LYS3* identified a 64-gene region on chromosome arm 5HL controlling 241 embryo size

242 Our previous work suggested that the *LYS3* gene in barley controls embryo size. To test this  
243 and to identify the *LYS3* gene, we developed a mapping population by crossing each of the  
244 three Risø *lys3* large-embryo mutants to Morex, a cultivar with normal embryo size and with  
245 available genome sequence data. Following self-pollination, the F<sub>2</sub> grains were genotyped  
246 with polymorphic markers in genes close to the *LYS3* locus on chromosome arm 5HL  
247 (Franckowiak, 1997). Lines with chromosomal recombination points close to *LYS3* were  
248 selected and allowed to self-pollinate. No lines with recombination events close to *lys3* were  
249 found for progeny from the Risø18 x Morex crosses and so further work involved progeny  
250 from crosses between Risø19 and Risø1508 only. Homozygous recombinant lines (and  
251 controls) were selected from the progeny for further genotypic and phenotypic analysis.

252 To design new markers for genotyping within the region of interest, we purified by flow  
253 cytometric sorting the 5H chromosomes from both *lys3* mutants and the parental control  
254 cultivar, Bomi, and we sequenced DNA amplified from them using Illumina HiSeq2500. The  
255 sequencing data was assembled using the MutChromSeq pipeline according to Steuernagel *et*  
256 *al.* (2017), and single nucleotide polymorphisms (SNPs) in the region of interest were  
257 identified. These SNPs were used to design KASP primers for further genotypic analysis  
258 (Supplementary Table S2).

259 To phenotype the homozygous recombinant lines, we first assessed embryo size visually  
260 (Table 1; Fig. 1A). The phenotype of selected critical lines was also assessed by measurement  
261 of relative embryo weight and  $\beta$ -amylase activity (Fig. 1B). In our previous work, we showed  
262 that all four *lys3* mutants had increased absolute and relative embryo weights (Cook *et al.*,  
263 2018). When tested again in different growth conditions (Fig. 2A), although the relative

264 embryo size was consistently increased for all *lys3* mutants, the increase in absolute embryo  
265 weight was significant for Risø1508 and M1460 only. For this reason, we used the relative  
266 embryo weight to phenotype the critical mapping lines. We also used  $\beta$ -amylase activity to  
267 phenotype these critical lines because it is known to be strongly affected by *lys3* mutations  
268 (Allison, 1978).

269 The visual phenotyping together with the genotyping data suggested that the gene that is  
270 responsible for the large-embryo phenotype lies between HORVU5Hr1G048110 and  
271 HORVU5Hr1G048950 (Table 1, Fig. 1A). Quantitative measurement of relative embryo size  
272 in critical lines confirmed the visual phenotyping results (Fig. 1B). The embryo weights for  
273 lines visually assessed as 'mutant' were significantly greater than the weights of those  
274 assessed as 'wild-type' ( $p < 0.05$ , Student's *t*-test). The phenotyping results for  $\beta$ -amylase  
275 activity were less clear due to a large amount of variation between the values within each  
276 group. Although collectively, the large-embryo lines had lower  $\beta$ -amylase activity than the  
277 wild-type lines, not all of the comparative differences between individual mutant and wild  
278 type lines were statistically significant (Fig. 1B).

279

### 280 3.2. *LYS3* encodes the transcription factor, PBF

281 To identify the gene responsible for controlling embryo size within the region of interest  
282 identified by mapping, we isolated and sequenced the 5H chromosome of the two other *lys3*  
283 mutants, Risø18 and M1460 and from an additional wild-type line, Minerva which is the  
284 parent of M1460. This sequencing information was combined with that of the three lines  
285 sequenced previously and bioinformatically assessed using a method based on MutChromSeq  
286 (a method that was used previously e.g. for the identification of disease-resistance genes in  
287 mutant barleys; Sanchez-Martin *et al.*, 2016). Only one gene in the region of interest (Fig.

288 1C) had mutations in all four mutant lines relative to the wild-type controls (Fig. 1D) and that  
289 was HORVU5Hr1G048700 which encodes the PBF transcription factor.

290 The *PBF* genes from all four *lys3* mutants were examined and all contained defects likely  
291 to be deleterious (Supplementary Table S1 and Fig. 1D). The sequences of three of the four  
292 *lys3 PBF* alleles are disrupted by SNPs. Risø1508 and M1460 both have the same SNP  
293 (A173T) which causes an amino acid substitution (Q58L) in the DOF (DNA binding with one  
294 zinc finger) DNA binding domain, consistent with Moehs *et al.* (2019). The glutamine  
295 residue, Q58 is highly conserved amongst orthologous proteins (Ensembl plants), with 27 out  
296 of 28 sequences examined having glutamine in this position. Risø19 has a single nucleotide  
297 polymorphism (G109T) which results in a nonsense mutation (E to STOP), which would  
298 prevent production of a full-length protein. In Risø18, various lines of evidence suggest that  
299 the entire *PBF* gene together with several additional genes on either side are deleted. Firstly,  
300 analysis of the chromosome 5H sequence data for Risø18 showed that sequence coverage  
301 around *PBF* was lacking (data not shown). Secondly, *PBF* could not be amplified by PCR  
302 with Risø18 DNA as template (Supplementary Figure S1). The presence of a large deletion  
303 around *LYS3* may also explain why we were unable to find any recombination close to this  
304 locus in the mapping lines derived from Risø18 (see 3.1).

305

### 306 3.3 Wheat *PBF* mutant grains have large embryos

307 To confirm that *PBF* is the gene responsible for controlling embryo size, we selected wheat  
308 cv. Cadenza TILLING lines (Krasileva *et al.*, 2017) each affected in one of the wheat *PBF*  
309 homoeologs (TraesCS5A02G155900, TraesCS5B02G154100 and TraesCS5D02G61000)  
310 (Supplementary Table S2D). For *PBF-A*, no nonsense (premature termination codon)  
311 mutations were available and so we selected two lines (Cadenza1533 and Cadenza1807) with  
312 missense mutations (F48Y and T46I, respectively) in the DOF domain that are likely to be

313 deleterious (SIFT score = 0.00). For the B- and D-genome *PBF* genes, we selected lines with  
314 nonsense mutations (Cadenza0903, Cadenza0904, respectively). Two triple mutant lines,  
315 Line 1 and Line 2, were created that contained the same B- and D-genome nonsense  
316 mutations but different A-genome missense mutations (Fig. 3A). Lines 2A and 2B contain  
317 the same three *PBF* mutations but were derived from different F<sub>1</sub> grains.

318 Grains and embryos from the triple mutant plants, wild-type sibling plants and  
319 Cadenza were compared (Fig. 2B and Fig. 3). This showed that the grains of all TILLING  
320 lines (both wild-type and mutant) were more shrivelled than those of the non-mutant parent,  
321 Cadenza grown at the same time (Fig. 2B). We assume that the shrivelled appearance of the  
322 wild-type TILLING lines is due to mutations other than those in *PBF*.

323 The Line 1 triple mutant grains and embryos were indistinguishable from wild-type  
324 sibling controls in appearance and weight (Fig. 2B and Fig. 3). We assume that the A-genome  
325 missense mutant (F48Y) used to create Line 1 (Cadenza1533) had no deleterious impact on  
326 *PBF* functionality. In contrast, both Lines 2A and 2B (using Cadenza1807 as the A genome  
327 missense mutant, T46I) had increased absolute and relative embryo weights compared to  
328 their wild type sibling controls and the grains were more shrivelled than their wild-type  
329 sibling controls (Figs. 2B and Fig. 3). Thus, in wheat as in barley, *PBF* suppresses embryo  
330 growth.

331

### 332 *3.4. Patterns of expression of PBF in barley*

333 The Barley eFB Browser ([www.bar.utoronto.ca/efp\\_barley](http://www.bar.utoronto.ca/efp_barley); Druka *et al.*, 2006; Winter *et al.*,  
334 2007) showed that *PBF* (HORVU5Hr1G048700) in cv. Morex is expressed in the developing  
335 grains (caryopsis) (Fig. 4A). Data for the developing embryo are available for one time point  
336 only: 22 DAF. *PBF* is expressed in the embryo at this time point, but at a low level compared  
337 with its expression in the rest of the caryopsis. *PBF* expression in other tissue types is very

338 low or absent. A similar pattern of expression was seen for wheat cv. Azhurnaya. The wheat  
339 eFB Browser ([www.bar.utoronto.ca/efp\\_wheat](http://www.bar.utoronto.ca/efp_wheat); Ramírez-González *et al.*, 2018; Winter *et al.*,  
340 2007) showed that expression for all three homoeologs was strong in the endosperm and that,  
341 for the one stage of development for which there is data, there was no expression in the  
342 embryo.

343 To compare with the data available for developing Morex embryos, and to expand upon it,  
344 the pattern of expression of *PBF* in developing embryos of the *LYS3* wild type, Bomi was  
345 determined using RT-PCR (Fig. 4B). Expression of *PBF* was detected in embryos at 23 and  
346 26 DAF but the expression at 17 and 20 DAF was low and comparable to that seen in some  
347 of the control reactions suggesting that it is expressed at higher levels after 20 DAF. In  
348 comparison, *PBF* expression was detected in the endosperm at all stages of development  
349 tested. To investigate the temporal and tissue specific patterns of expression of *PBF* in young  
350 developing barley grains of cv Bomi further, we used *in situ* hybridization (Fig. 4C). This  
351 showed that at 8 DAF, *PBF* is expressed intensely in starchy endosperm cells and sparsely in  
352 aleurone cells. In the embryo at 12 DAF, *PBF* is expressed in the scutellum, the coleoptile  
353 and the tip of the coleorhiza.

354 To determine when during grain development the suppression of embryo growth occurs,  
355 we compared the fresh weights of developing Bomi embryos with those of the *lys3* mutant  
356 Risø19 (Fig. 4D). This showed that *lys3* mutant embryos were significantly larger than wild  
357 type embryos only after 23 DAF (Student's *t*-test,  $p=0.01$ ). Thus, in wild-type embryos, the  
358 onset of *PBF* expression precedes the suppression of embryo growth.

359

### 360 3.5. *In silico* prediction of the downstream targets of wheat *PBF*

361 To understand how mutations in *PBF* effect both endosperm and embryo development and  
362 how these might be manipulated individually, we investigated the targets of this transcription



363 factor. PBF is known to activate or repress the transcription of a number of genes by binding  
364 to specific sequences in their promotor regions called prolamin (TGTAAG or CTTTACT)  
365 or pyrimidine (CCTTTT or AAAAGG) boxes (Mena *et al.*, 1998; Mena *et al.*, 2002). In  
366 developing barley endosperm, PBF target genes include B-hordein (*Hor2*) and trypsin-  
367 inhibitor BTI-CMe (*Itr1*) and in germinating barley grains, cathepsin B-type protease (*Al21*)  
368 and  $\alpha$ -Amylase (*Amy2/32b*) are PBF targets (Mena *et al.*, 1998; Diaz *et al.*, 2002; Mena *et al.*,  
369 2002). Nothing is yet known about PBF targets in developing barley embryos.

370 At present, the data and tools available for target gene analysis are more advanced for  
371 wheat than for barley. Wheat transcription-factor targets can be predicted using a GENIE3  
372 network, which was created using 850 diverse RNAseq samples from wheat (Ramírez-  
373 González *et al.*, 2018). Using the GENIE3 network to predict the downstream targets of the  
374 wheat *PBF* homoeologs, we identified >450 gene targets. We found that these target genes  
375 were enriched for a wide range of gene ontology (GO) annotations (Supplementary Fig. S2  
376 and Fig. 5) but the two categories that were the most significantly enriched were organ  
377 development and starch metabolism.

378 To investigate whether PBF directly regulates genes known to be involved in  
379 controlling embryo size, we looked at the downstream targets of PBF for homologues of  
380 three genes known to give rise to large embryo/small endosperm mutant phenotypes in rice  
381 (*Oryza sativa* L.). The genes examined were *GIANT EMBRYO* (*GE*), encoding a cytochrome  
382 P450 (CYP78A13) (Sato and Omura, 1981; Nagasawa *et al.*, 2013); *BIGE1*, encoding a  
383 MATE (Multidrug-And-Toxic-compound-Extrusion) type transporter protein (Suzuki *et al.*,  
384 2015); and *LARGE EMBRYO*, encoding a C3HC4-type RING (Really Interesting New Gene)  
385 finger protein of unknown function (Lee *et al.*, 2019). None of these three genes was a  
386 predicted target of the wheat *PBF* ortholog.

387 To determine whether *PBF* participates in the same regulatory networks (or modules)  
388 as any of the other large-embryo genes (*GE*, *BIGE1* and *LARGE EMBRYO*), we used co-  
389 expression networks built using WGCNA (Ramírez-González *et al.*, 2018) (Supplementary  
390 Table S3). For the grain-specific network, the wheat homoeologs of *PBF* are in module 13,  
391 *BIGE1* in module 2 and *GE* in module 2 (B genome) or 9 (A and D genome). The *LARGE*  
392 *EMBRYO* homoeologs are in module 0, suggesting that the expression of these genes is  
393 invariant across all grain samples. Thus, for wheat it is likely that *PBF* regulates embryo size  
394 independently of the other three genes whilst *BIGE1* and the B genome of *GE* both operate  
395 within the same regulatory network.

396 *PBF* was so named because it was found to recognise a conserved cis-element, the  
397 prolamin box, in the promotor regions of prolamin seed storage proteins (Wu and Messing,  
398 2012). In barley, *PBF* was also shown to bind to the pyrimidine box of genes expressed in  
399 aleurone cells during seed germination (Mena *et al.*, 2002). To investigate whether *PBF*  
400 regulates genes involved in starch metabolism by binding to prolamin or pyrimidine boxes in  
401 their promotor regions, as is the case for other genes regulated by *PBF*, we analysed the  
402 promotor regions of 27 genes involved in starch synthesis in the endosperm (Supplementary  
403 Table S4). This showed that ten of the starch genes have a prolamin box within the 2-kbp  
404 upstream regulatory (promotor) region of at least one homoeologue, all 27 genes have a  
405 pyrimidine box and 11 genes were predicted by GENIE3 to be downstream targets of *PBF*.  
406 Ten starch genes have both prolamin and pyrimidine boxes of which only four were predicted  
407 targets. Seven additional genes were predicted targets of *PBF* and these lacked a prolamin  
408 box. Thus, for this limited data set, there is little or no correlation between the presence of the  
409 two known *PBF* regulatory sequences in starch gene promoters and their interactions with  
410 *PBF* as predicted from gene expression studies. Despite its name, *PBF*, like other  
411 transcription factors, probably interacts with a range of DNA regulatory sequences.

### 412 3. Discussion

413 We showed by genetic mapping that the *LYS3* gene encodes a transcription factor called  
414 Prolamin Binding Factor (PBF), and that one of the many effects of mutations in this gene is  
415 an increase in embryo size. All four *lys3* alleles have deleterious mutations in the *PBF* gene  
416 (Supplementary Table S1) and wheat TILLING mutants with mutations in *PBF* also have  
417 enlarged embryos (Fig. 3), confirming a role for *PBF* in determining organ size in Triticeae  
418 grains. The *LYS3* gene was also identified as *PBF* independently by Moehs *et al.* (2019).  
419 However, they studied the effect of *LYS3* on hordein content in one mutant, *lys3a* and they  
420 did not measure embryo size.

421 The severity of the effects of *lys3* alleles on embryo size varies, with Risø1508 and  
422 M1460 having larger embryos than either Risø18 or Risø19 (Fig. 1A). The reasons for this  
423 are currently unknown but the two least-severe mutants, Risø18 or Risø19 both lack the PBF  
424 protein (due to nonsense mutations), whilst the two mutants with the largest embryos,  
425 Risø1508 and M1460 have the same missense mutation (A173T) affecting their DOF  
426 domains. Proteins encoded by genes with missense mutations can be partially defective,  
427 rather than entirely absent or entirely defective. It is therefore possible that the missense  
428 mutation in Risø1508 and M1460 weakens or eliminates the ability of PBF to bind to DNA,  
429 but does not affect its interactions with other regulatory proteins. This hypothesis requires  
430 investigation.

431 Previous studies have shown that *PBF* is expressed in starchy endosperm and  
432 aleurone cells during barley grain development (Mena *et al.*, 1998; Mena *et al.*, 2002) and in  
433 the aleurone during germination (Mena *et al.*, 2002) but no expression in developing embryos  
434 was detected using Northern blots (Mena *et al.*, 2002). In this study, we confirmed the  
435 expression of *PBF* in starchy endosperm and aleurone cells in developing barley grains. We  
436 also showed using RT-PCR and *in situ* hybridization that *PBF* is expressed in developing

437 embryos (Fig. 4B, C). *PBF* expression in the embryo increased during grain development but  
438 expression was detected prior to the time point when embryo growth in wild-type and mutant  
439 grains diverged. These data suggest that control of embryo growth could be mediated by *PBF*  
440 expression in the embryo and not indirectly via its expression in the endosperm. Thus, gene  
441 regulation by PBF in embryos may involve a regulatory pathway that is independent from the  
442 PBF pathway operating in the endosperm.

443         To understand the regulatory pathways downstream of PBF in developing Triticeae  
444 grains, we used *in silico* prediction of target genes based on wheat RNAseq data (Ramírez-  
445 González et al 2018; Harrington et al 2019). This indicated that PBF in developing grains is  
446 involved in the regulation of a wide range of processes but the two most significant  
447 categories were organ development and starch metabolism (mirroring its principal roles in  
448 embryo growth and endosperm starch synthesis, respectively). Other genes known to cause  
449 large embryos when mutated in rice were considered as potential downstream targets of PBF  
450 but no such interactions were predicted from analysis of published RNAseq data. We also  
451 looked for evidence of co-expression of *PBF* with these other genes in wheat grains. No such  
452 evidence was found. Thus, the PBF transcriptional network that controls embryo growth  
453 remains unknown. However, it must be noted that the expression data used for this *in silico*  
454 analysis included three embryo samples only (Ramírez-González et al 2018). More RNAseq  
455 data will need to be gathered for developing embryos to test these ideas further.

456         In maize, as in wheat and barley, there is a *PBF* gene that regulates starch metabolism  
457 suggesting that the regulation of endosperm starch synthesis by *PBFs* may be a common  
458 feature amongst grasses. Maize PBF controls the expression of four starch biosynthetic genes,  
459 *Sh2* and *Bt2* that encode, respectively, the cytosolic large and small subunits of ADP glucose  
460 pyrophosphorylase (AGPase); *SBEI* encoding starch branching enzyme I and *Su1* that  
461 encodes isoamylase 1. The expression of both AGPase subunit genes was down-regulated in

462 maize *PBF* RNAi lines whilst the other two genes were up-regulated (Zhang *et al.*, 2016).

463 Orthologs of all four genes in wheat are also predicted target genes of wheat *PBF*

464 (Supplementary Table S4) suggesting that the *PBF* transcription factors in maize and the

465 Triticeae species interact with similar sets of downstream genes. However, there is no

466 information to date to suggest that *PBF* controls embryo size in maize.

467         Large-embryo size in cereals is associated with increased nutritional value because

468 embryos are rich in protein, vitamins, oil and non-starch carbohydrates. There is also

469 evidence of human health benefits from eating large-embryo rice grain products (Zhang *et*

470 *al.*, 2005; Lee *et al.*, 2016; Jung *et al.*, 2017). As wholegrain products are becoming

471 increasingly popular for human consumption, cereal grains with large embryos offer new

472 opportunities for cereal grain improvement. We have shown that barley and wheat with

473 mutations in *PBF* have enlarged embryos but unfortunately, they also have reduced grain size

474 due to endosperm defects. However, the possibility that the regulatory networks controlled by

475 *PBF* in the endosperm and embryo are independent provides an opportunity to explore their

476 independent manipulation. Further work is in progress to pursue this idea.

477

478 **Acknowledgements**

479 This work was supported by the Biotechnology and Biological Sciences Research Council  
480 (BBSRC), UK [grant numbers BB/L023156/1 and BB/P016855/1] and an Anniversary Future  
481 Leader Fellowship BB/M014045/1 to PB. CUS thanks TETFUND Nigeria for a PhD training  
482 grant. JD and MK were supported by ERDF project "Plants as a tool for sustainable global  
483 development" (No. CZ.02.1.01/0.0/0.0/16\_019/0000827). We thank Zdeňka Dubská, Romana  
484 Šperková, Jan Vrána and Jitka Weiserová for sample preparation, chromosome sorting and  
485 DNA amplification.

486

487 **AUTHOR CONTRIBUTIONS**

488 KT designed the project, with advice from CU, PB and BBHW. NS generated and analysed  
489 the mapping populations. MK managed chromosome sorting and performed purity checks  
490 under the supervision of JD. Bioinformatic analysis of the sequenced chromosome was done  
491 by BS with help and advice from CU and BBHW. BOL carried out the bulk of the other  
492 experimental work on barley and BOL and PB carried out the wheat *PBF* target gene  
493 predictions. TC and MC were responsible for the production and analysis of the wheat  
494 TILLING mutants. CUS performed the in situ analysis, and SD supervised this work. BOL  
495 and KT wrote the paper together and all authors proof-read the paper and provided feedback.  
496 Authors, apart from the first and last, are listed alphabetically.

497 **References**

- 498 Aastrup, S., 1983. Selection and characterization of low beta-glucan mutants from barley.  
499 Carlsberg Research Communications 48, 307-316.
- 500 Alabdullah, A.K., Borrill, P., Martin, A.C., Ramírez-González, R.H., Hassani-Pak, K., Uauy,  
501 C., Shaw, P., Moore, G. 2019. A co-expression network in hexaploid wheat reveals  
502 mostly balanced expression and lack of significant gene loss of homeologous meiotic  
503 genes upon polyploidization. *Frontiers in Plant Science* 10, 1325.
- 504 Allison, M.J. 1978. Amylase activity and endosperm hardness of high lysine barleys. *Journal*  
505 *of the Institute of Brewing*, 84, 231-232.
- 506 Brandt, A. 1976. Endosperm protein formation during kernel development of wild type and a  
507 high-lysine barley mutant. *Cereal Chem.* 53, 890.
- 508 Cook, F., Hughes, N., Nibau, C., Orman-Ligeza, B., Schatlowski, N., Uauy C., Trafford, K.  
509 2018. Barley *lys3* mutants are unique amongst shrunken-endosperm mutants in having  
510 abnormally large embryos. *Journal of Cereal Science* 82, 16–24.
- 511 Deggerdal, A., Klemsdal, S.S., Olsen, O.A., 1986. The effect of the high-lysine genes of the  
512 barley mutants Risø1508 and 527 on embryo development. *Physiologia Plantarum* 68,  
513 410-418.
- 514 Diaz, I., Vicente-Carbajosa, J., Abraham, Z., Martínez, M., Isabel-La Moneda, I., Carbonero,  
515 P. 2002. The GAMYB protein from barley interacts with the DOF transcription factor  
516 BPBF and activates endosperm-specific genes during seed development. *Plant Journal*  
517 29, 453-64.
- 518 Doll, H. 1976. Genetic studies of high lysine barley mutants. In: Gaul, H. (Ed.) *Barley*  
519 *Genetics III. Proceedings of the Third International Barley Genetics Symposium.*  
520 Verlag Karl Thiemig, Munich, pp. 542-546.

- 521 Doll, H., Koie, B., Eggum, B.O., 1974. Induced high lysine mutants in barley. Radiation  
522 Botany 14, 73-80.
- 523 Dracatos, P.M., Bartoš, J., Elmansour, H., Singh, D., Karafiátová, M., Zhang, P., Steuernagel,  
524 B., Svačina, R., Cobbin, J.C.A., Clark, B., Hoxha, S., Khatkar, M.S., Doležel, J.,  
525 Wulff, B.B., Park, R.F., 2019. The coiled-coil NLR *Rph1*, confers leaf rust resistance  
526 in barley cultivar Sudan. Plant Physiology 179, 1362-1372.
- 527 Drea S, Corsar J, Crawford B, Shaw P, Dolan L, and Doonan JH. 2005. A streamlined  
528 method for systematic, high-resolution *in situ* analysis of mRNA distribution in  
529 plants. Plant Methods 1, 8.
- 530 Druka, A. Muehlbauer, G., Druka, I., Caldo, R., Baumann, U., Rostoks, N., Schreiber, A.,  
531 Wise, R., Close, T., Kleinhofs, A., Graner, A., Schulman, A., Langridge, P., Sato, K.,  
532 Hayes, P., McNicol, J., Marshall, D., Waugh, R. 2006. An atlas of gene expression  
533 from seed to seed through barley development. Functional and Integrative Genomics  
534 6, 202-211.
- 535 Fulton, T.M, Chunwongse, J., Tanksley, S.D. 1995. Microprep protocol for extraction of  
536 DNA from tomato and other herbaceous plants. Plant Molecular Biology Reporter 13,  
537 207–209.
- 538 Frankowiak, J. 1997. Revised linkage maps for morphological markers in barley, *Hordeum*  
539 *vulgare*. Barley Genetics Newsletter 26: 9-21.
- 540 Gabert, V.M., Brunsgaard, G., Eggum, B.O., Jensen, J. 1995. Protein quality and digestibility  
541 of new high-lysine barley varieties in growing rats. Plant Foods for Human Nutrition  
542 48, 169-179.
- 543 Gabert, V.M., Jorgensen, H., Brunsgaard, G., Eggum, B.O., Jensen, J. 1996. The nutritional  
544 value of new high-lysine barley varieties determined with rats and young pigs.  
545 Canadian Journal of Animal Science 76, 443-450.



- 546 Harrington, S.A., Backhaus, A.E., Singh, A., Hassani-Pak, K., Uauy, C. 2019. Validation and  
547 characterisation of a wheat GENIE3 network using an independent RNA-Seq dataset.  
548 doi: <http://dx.doi.org/10.1101/684183>.
- 549 Ingversen, J., Koie, B., Doll, H., 1973. Induced seed protein mutant of barley. *Experientia* 29,  
550 1151-1152.
- 551 Jung, W.Y., Kim, S.G., Lee, J.S., Kim, H.K., Son, B.G., Kim, J.W., Suh, J.W. 2017. Effect of  
552 feeding high gamma-aminobutyric acid-containing giant embryo black sticky rice  
553 (*Oryza sativa* L.) on anxiety-related behavior of C57BL/6 Mice. *J Med Food* 20, 777-  
554 781.
- 555 Krasileva, K.V., Vasquez-Gross, H.A., Howell, T., Bailey, P., Paraiso, F., Clissold, L.,  
556 Simmonds, J., Ramírez-González, R.H., Wang, X., Borrill, P., Fosker, C., Ayling, S.,  
557 Phillips, A.L. Uauy, C., Dubcovsky, J. 2017. Uncovering hidden variation in  
558 polyploid wheat. *PNAS* 114 (6) E913-E921, [doi.org/10.1073/pnas.1619268114](https://doi.org/10.1073/pnas.1619268114)
- 559 Kubaláková, M., Valárik, M., Bartoš, J., Vrána, J., Číhalíková, J., Molnár-Láng, M.,  
560 Doležel, J. 2003. Analysis and sorting of rye (*Secale cereale* L.) chromosomes using flow  
561 cytometry. *Genome* 46: 893-905.
- 562 Lee, G., Piao, R., Lee, Y. *et al.* 2019. Identification and characterization of LARGE  
563 EMBRYO, a new gene controlling embryo size in rice (*Oryza sativa* L.). *Rice* 12, 22.
- 564 Li, H., Durbin, R. 2009. Fast and accurate short read alignment with Burrows-Wheeler  
565 transform. *Bioinformatics* 25, 1754-1760.
- 566 Li, H., Handsaker, B., Wysoker, A., Fennell, T., Ruan, J., Homer, N., Marth, G., Abecasis,  
567 G., Durbin, R. 1000 Genome Project Data Processing Subgroup. 2009. The Sequence  
568 Alignment/Map format and SAMtools. *Bioinformatics* 25, 2078-2079.

- 569 Lysák, M.A., Číhalíková, J., Kubaláková, M., Šimková, H., Künzel, G., Doležel, J. 1999.  
570 Flow karyotyping and sorting of mitotic chromosomes of barley (*Hordeum vulgare*  
571 L.). Chrom. Res. 7: 431-444.
- 572 Mena, M., Vicente-Carbajosa, J., Schmidt, R.J., Carbonero, P. 1998. An endosperm-specific  
573 DOF protein from barley, highly conserved in wheat, binds to and activates  
574 transcription from the prolamin-box of a native B-hordein promoter in barley  
575 endosperm. Plant Journal 16, 53–62.
- 576 Mena, M., Cejudo, F.J., Isabel-Lamoneda, I., Carbonero, P., 2002. A role for the DOF  
577 transcription factor BPBF in the regulation of gibberellin-responsive genes in barley  
578 aleurone. Plant Physiology 130, 111–119.
- 579 Moehs, C.P., Austill, W.J., Holm, A., Large, T.A.G., Loeffler, D., Mullenberg, J., Schnable,  
580 P.S., Skinner, W., Boxtel, J., Wu, L., McGuire, C. 2019. Development of decreased-  
581 gluten wheat enabled by determination of the genetic basis of *lys3a* barley. Plant  
582 Physiology 179, 1692–1703.
- 583 Mossberg, R., 1969. Evaluation of protein quality and quantity by dye-binding capacity: a  
584 tool in plant breeding. In: New approaches to breeding for improved plant protein.  
585 International Atomic Energy Agency, Vienna, pp. 151-161.
- 586 Munck, L., 1992. The case of high-lysine barley breeding. In: Shewry, P.R. (Ed.), Barley:  
587 Genetics, Biochemistry, Molecular Biology and Biotechnology. CAB International,  
588 Wallingford Oxon, pp. 573–601.
- 589 Munck, L., Jespersen, B.M. 2009. The multiple uses of barley endosperm mutants in plant  
590 breeding for quality and for revealing functionality in nutrition and food technology.  
591 In: Shu, Q.Y. (Ed), Induced plant mutations in the genomics era. Proceedings of an  
592 International Joint Food and Agriculture Organisation / International Atomic Energy

- 593 Agency Symposium, 2008. Food and Agriculture Organisation of the United Nations,  
594 Rome, pp. 182-186.
- 595 Munck, L. 1972. High lysine barley - a summary of the present research development in  
596 Sweden. Barley Genetics Newsletter 2, 54-60.
- 597 Mortensen, H.P., Madsen, A., Hall, D.D., Munck, L., Bang-Olsen, K., Stilling, B. 1988.  
598 Protein and amino acids for growing pigs. High-lysine barley (in Danish). Beretning  
599 fra Statens Husdyrbrugsforsøg: 29 pp.
- 600 Nagasawa N, Hibara K, Heppard EP, Vander Velden KA, Luck S, Beatty M, Nagato Y, Sakai  
601 H. 2013. GIANT EMBRYO encodes CYP78A13, required for proper size balance  
602 between embryo and endosperm in rice. Plant J. 75, 592-605.
- 603 Olsen, O.A., Krekling, T., Nissen, O., Ayaz, M., 1984. An ultrastructural approach to the  
604 problem of barley high lysine gene action. In: Cereal grain protein improvement.  
605 International Atomic Energy Agency, Vienna, pp. 241-257.
- 606 Opanowicz M, Hands P, Betts D, Parker ML, Toole GA, Mills EN, Doonan JH, Drea S.  
607 2011. Endosperm development in *Brachypodium distachyon*. Journal of Experimental  
608 Botany 62, 735-748.
- 609 Ramírez-González, R.H., Borrill, P., Lang, D., Harrington, S.A., Brinton, J., Venturini, L.,  
610 Davey, M., Jacobs, J., van Ex, F., Pasha, A., Khedikar, Y., Robinson, S.J., Cory, A.T.,  
611 Florio, T., Concia, L., Juery, C., Schoonbeek, H., Steuernagel, B., Xiang, D., Ridout,  
612 C.J., Chalhoub, B., Mayer, K.F.X., Benhamed, M., Latrasse, D., Bendahmane, A.  
613 International Wheat Genome Sequencing Consortium, Wulff, B.B.H., Appels, R.,  
614 Tiwari, V., Datta, R., Choulet, F., Pozniak, C.J., Provart, N.J., Sharpe, A.G., Paux, E.,  
615 Spannagl, M., Bräutigam, A., Uauy, C. 2018. The transcriptional landscape of  
616 polyploid wheat. Science 17, 361.

- 617 Satoh, H. and Omura, T. 1981. New endosperm mutations induced by chemical mutagens in  
618 rice. Japanese Journal of Breeding 131, 316-326.
- 619 Sanchez-Martin, J., Steuernagel, B., Ghosh, S., Herren, G., Hurni, S., Adamski, N., Vrána, J.,  
620 Kubaláková, M., Krattinger, S.G., Wicker, T., Doležel, J., Keller, B., Wulff, B.B.H.  
621 2016. Rapid gene isolation in barley and wheat by mutant chromosome sequencing.  
622 Genome Biol 17, 221.
- 623 Šimková, H., Svensson, J.T., Condamine, P., Hříbová, E., Suchánková, P., Bhat, P.R., Bartoš,  
624 J., Šafář, J., Close, T.J., Doležel, J. 2008. Coupling amplified DNA from flow-sorted  
625 chromosomes to high-density SNP mapping in barley. BMC Genomics 9, 294.
- 626 Steuernagel, B., Vrána, J., Karafiátová, M., Wulff, B.B.H., Doležel, J. 2017. Rapid gene  
627 isolation using MutChromSeq. Methods in Molecular Biology 1659, 231-243.
- 628 Suzuki, M., Sato, Y., Wu, S., Kang, B-H., McCarty, D.R. 2015. Conserved functions of the  
629 MATE transporter BIG EMBRYO1 in regulation of lateral organ size and initiation  
630 rate. Plant Cell 27, 2288-2300.
- 631 Tallberg, A., 1977. Amino acid composition in endosperm and embryo of a barley variety  
632 and its high lysine mutant. Hereditas 87, 43-46.
- 633 Trafford, K., and Fincher, G.B. 2014. Barley grain carbohydrates: starch and cell walls. In: P.  
634 R. Shewry and S. E Ullrich (Eds.) Barley: chemistry and technology. Minnesota, MN:  
635 AACC International press, pp. 71-95.
- 636 Winter, D., Vinegar, B., Nahal, H., Ammar, R., Wilson, G.V., Provart, N.J. 2007. An  
637 “electronic fluorescent pictograph” browser for exploring and analyzing large-scale  
638 biological data sets. PLoS ONE 2(8): e718.  
639 <https://doi.org/10.1371/journal.pone.0000718>
- 640 Wu, Y., Messing, J. 2016. Rapid divergence of prolamin gene promoters of maize after gene  
641 amplification and dispersal. Genetics 192, 507-519.

- 642 Young, M.D., Wakefield, M.J., Smyth, G.K., Oshlack, A. 2010. Gene ontology analysis for  
643 RNA-seq: accounting for selection bias. *Genome Biology* 11, R14.
- 644 Zhang, Z., Zheng, X., Yang, J., Messing, J., Wu, Y. 2016. Maize endosperm-specific  
645 transcription factors *O2* and *PBF* network the regulation of protein and starch  
646 synthesis. *PNAS* 113, 10842-10847.
- 647 Zhang, L.L., Hu, P.S., Tang, S.Q., Zhao, H.J., Wu, D.X. 2005. Comparative studies on major  
648 nutritional components of rice with a giant embryo and a normal embryo. *Journal of*  
649 *Food Biochemistry* 29, 653-661.

650 **Table 1. Fine-mapping *LYS3* in barley.**

651 The genotypes of genes close to *LYS3* are shown: A = wild type (Morex), B = Bomi and *lys3*  
 652 mutant. The embryo-size phenotype was assessed visually: WT = wild type (normal-sized  
 653 embryos), MUT = mutant (large embryos). The two genes defining the *LYS3* region are  
 654 shown in bold. The *PBF* gene, HORVU5Hr1G048700 is underlined.

| Line     | <i>lys3</i> parent | Visual embryo phenotype | Number of plants analysed | Genotype (Gene ID = HORVU5Hr1G04xxxx) |      |             |      |      |             |             |      |      |
|----------|--------------------|-------------------------|---------------------------|---------------------------------------|------|-------------|------|------|-------------|-------------|------|------|
|          |                    |                         |                           | 7540                                  | 7890 | <b>8110</b> | 8380 | 8630 | <u>8700</u> | <b>8950</b> | 9180 | 9330 |
| Morex    |                    | WT (control)            |                           | A                                     | A    | A           | A    | A    | A           | A           | A    | A    |
| Line 92  | Risø19             | WT                      | 2                         | B                                     | B    | A           | A    | A    | A           | A           | A    | A    |
| Line 93  | Risø1508           | WT                      | 3                         | B                                     | B    | B           | A    | A    | A           | A           | A    | A    |
| Line 123 | Risø1508           | WT                      | 2                         | B                                     | B    | B           | A    | A    | A           | A           | A    | A    |
| Line 94  | Risø19             | MUT                     | 1                         | B                                     | B    | B           | B    | B    | B           | A           | A    | A    |
| Line 125 | Risø1508           | MUT                     | 1                         | B                                     | B    | B           | B    | B    | B           | B           | B    | A    |
| Line 115 | Risø1508           | WT                      | 1                         | A                                     | A    | A           | A    | A    | A           | A           | B    | B    |
| Line 121 | Risø1508           | WT                      | 8                         | A                                     | A    | A           | A    | A    | A           | B           | B    | B    |
| Line 122 | Risø19             | WT                      | 6                         | A                                     | A    | A           | A    | A    | A           | B           | B    | B    |
| Line 124 | Risø1508           | WT                      | 5                         | A                                     | A    | A           | A    | A    | A           | B           | B    | B    |
| Line 116 | Risø19             | MUT                     | 10                        | A                                     | A    | B           | B    | B    | B           | B           | B    | B    |
| Line 117 | Risø19             | MUT                     | 3                         | A                                     | A    | B           | B    | B    | B           | B           | B    | B    |
| Risø19   |                    | MUT (control)           |                           | B                                     | B    | B           | B    | B    | B           | B           | B    | B    |
| Risø1508 |                    | MUT (control)           |                           | B                                     | B    | B           | B    | B    | B           | B           | B    | B    |
| 655 Bomi |                    | WT                      |                           | B                                     | B    | B           | B    | B    | B           | B           | B    | B    |

656 **Figure 1. Map-based cloning of the gene controlling embryo size.**

657 A. Representative images of grains and embryos from the lines described in Table 1 are  
658 shown. Top row = dry, mature grains. Middle row = excised embryos, abaxial surface  
659 uppermost. Lower row = excised embryos, adaxial surface uppermost. The scale bars  
660 are 5 mm for grains and 2 mm for embryos.

661 B. Relative embryo weight and  $\beta$ -amylase activity were determined for selected lines  
662 shown in Table 1. The values for relative embryo weight are the means  $\pm$  SE for 5  
663 plants and 10 grains were measured per plant. The values for  $\beta$ -amylase activity are  
664 the means  $\pm$  SE for three plants. One grain from the middle of the ear was assayed per  
665 plant. All assays were triplicated.

666 C. The gene controlling embryo size maps to a region on chromosome arm 5HL. The  
667 two markers/genes flanking this region are shown in bold. The *LYS3/PBF* gene  
668 controlling embryo size was identified as HORVU5Hr1G048700. Gene names are  
669 abbreviated: xxxx = HORVU5Hr1G04xxxx.

670 D. An alignment of PBF amino acid sequences showing the positions of the DOF domain  
671 and the SNP mutations. (Risø18 lacks *PBF* and is therefore not shown).

672

673 **Figure 2. *PBF* affects embryo weight in barley and wheat.**

674 The absolute and relative dry weights of the embryo and non-embryo grain parts of wild-  
675 types (black bars) and mutants (white bars) are shown. Mean values  $\pm$ SE are for 11 to 13  
676 (barley) or 25 (wheat) replicate biological samples. Each sample contained 10 grains. Values  
677 for mutants that are significantly different from the values for their relevant wild-type  
678 controls (Students t-test,  $p < 0.05$ ) are indicated by an asterisk.

679 A. Barley mutants. Risø1508, Risø18 and Risø19 and M1460 are *lys3* mutants. Bomi is the  
680 wild-type parent of the three Risø mutants.

681 B. Wheat TILLING mutants. Lines are as described in Figure 3.

682

683 **Figure 3. Wheat *PBF* TILLING mutants.**

684 Two wheat *PBF* triple mutant (aabbdd) lines were created by combining single A, B and D-  
685 homoeolog TILLING mutations in a single plant. Line 1 = Cadenza1533 x Cadenza0903 x  
686 Cadenza0904 (A missense x B nonsense x D nonsense). Line 2 = Cadenza1807 x  
687 Cadenza0903 x Cadenza0904 (A missense x B nonsense x D nonsense). Line 2A and 2B  
688 were derived from different F<sub>1</sub> grains.

689 A. A diagram of the *PBF* A, B and D gene structures. The exons are shown as bars and  
690 intron as lines. The coding regions are black and the DNA-binding DOF domain is  
691 red. The positions of the mutations are indicated by arrows. The two missense  
692 mutations are separated by 5 bp. C = Cadenza, NS = nonsense, MS = missense.

693 B. Representative wild type (AABBDD) and mutant (aabbdd) F<sub>3</sub> grains, and grains of  
694 the non-mutant, parental cultivar Cadenza are shown. All five grains of each type are  
695 from a single plant. All F<sub>2</sub> plants were grown as a single batch.

696 C. Representative wild type (AABBDD) and mutant (aabbdd) embryos are shown.  
697 Embryos are from F<sub>3</sub> grains, as shown in Figure 3B.

698

699 **Figure 4. Patterns of expression of *PBF/LYS3* in barley.**

700 A. Tissue-specific expression according to the Barley eFP Browser 2.0  
701 ([www.bar.utoronto](http://www.bar.utoronto)). Samples are from barley cv. Morex. Caryopsis (no Emb) means  
702 caryopsis without embryo.

703 B. Temporal and tissue-specific patterns of *LYS3/PBF* expression in developing grains of  
704 wild type (Bomi) assessed by RT-PCR. Each cDNA sample was from a pool of 10-75  
705 tissue samples each from an individual grain. Samples were collected from at least



706 five spikes, each from a different plant. Amplicons were visualized on 1% agarose  
707 gels stained with SYBR Safe (Invitrogen, UK). Numbers above panels are DAF. *PBF*  
708 = *Prolamin Binding Factor* (HORVU5Hr1G048700). *ACT* =  
709 *ACTIN*.(HORVU1Hr1G047440), a constitutively expressed gene. Control reactions  
710 varied from the test reactions as follows. C1: contained cDNA from the barley *PBF*  
711 deletion mutant Risø18 at 26 DAF. No product was observed showing that the  
712 primers used were specific for *PBF*. C2: no DNase, no reverse transcriptase (RT). C3:  
713 no DNase. C4: no RT. C5: contained water used for PCR instead of cDNA.

714 C. *In situ* localization of *PBF* in developing wild type (Bomi) grains at 8 and 12 DAF. (i)  
715 Longitudinal section of 8 DAF grain stained with antisense probe. *PBF* is expressed  
716 mostly in the starchy endosperm (En) cells. (ii) Longitudinal section of 12 DAF grain  
717 (including the embryo) stained with an antisense probe. *PBF* is expressed in the  
718 scutellum (Sc), coleoptile (Co) and coleorhiza tip (Cr). *PBF* is not expressed in the  
719 radicle (Ra). (iii) Longitudinal section of 12 DAF as in (ii) but stained with a sense  
720 probe (negative control). Scale bars are 0.5 mm (i) and 20 mm (ii and iii).

721 D. Embryo fresh weight in developing grains of wild type (Bomi) and *lys3* mutant  
722 Risø19. Embryos were extracted from developing grains and immediately weighed.  
723 Values are means  $\pm$  SE ( $n > 4$ ) for 10 embryos extracted from the middle of at least  
724 three spikes. Values are significantly different ( $p < 0.05$ , Tukey's HSD after one-way  
725 Anova, mutant compared to wild type) for 26, 29 and 32 DAF (as indicated by  
726 asterisk). Error bars are included for all data and if not visible are smaller than the  
727 marker.

728

729 Figure 5. **Downstream targets of wheat *PBF*.**

730 The downstream target genes of *PBF* were identified using a GENIE3 network constructed  
731 using 850 RNA-seq samples (Ramírez-González et al., 2018).

732 A. A comparison of the target genes of each of the wheat *PBF* homoeologs. The number of  
733 predicted target genes common to all three homoeologs is 226.

734 B. The 226 common target genes were analysed for evidence of enrichment with respect to  
735 molecular function. The top-ranking functional categories (adjusted p value <0.05) are  
736 presented with the significance of the enrichment [ $-\log(\text{adjP-value})$ ]. In brackets are the  
737 numbers of genes detected in each category with respect to all GO terms annotated so far  
738 for wheat RefSeqv1 gene models (Ramírez-González *et al.*, 2018). GO terms related to  
739 starch metabolism are in orange, organ development in yellow, and others in grey.

740 **Figure 1**

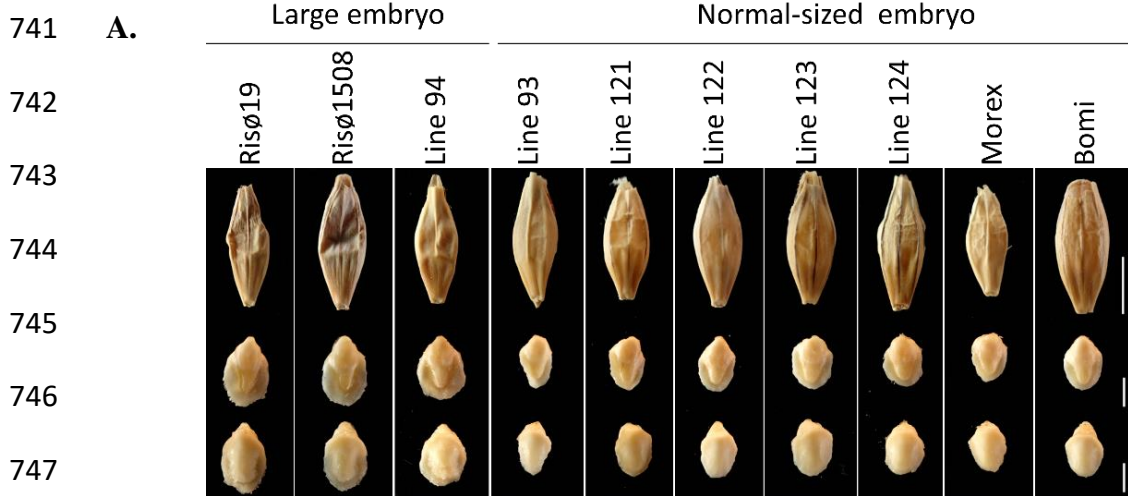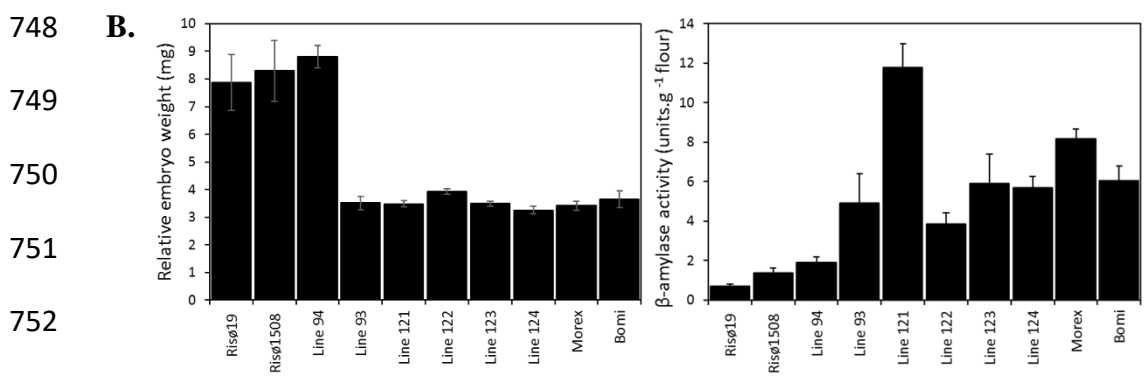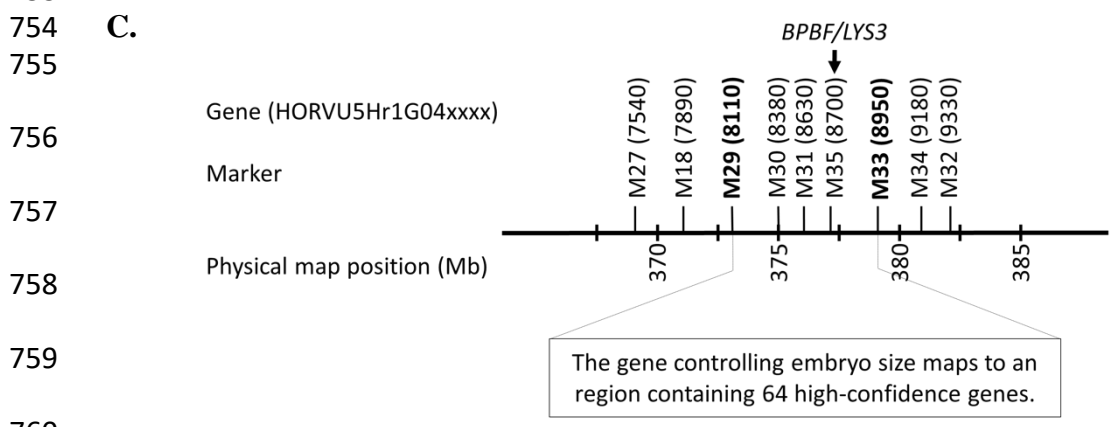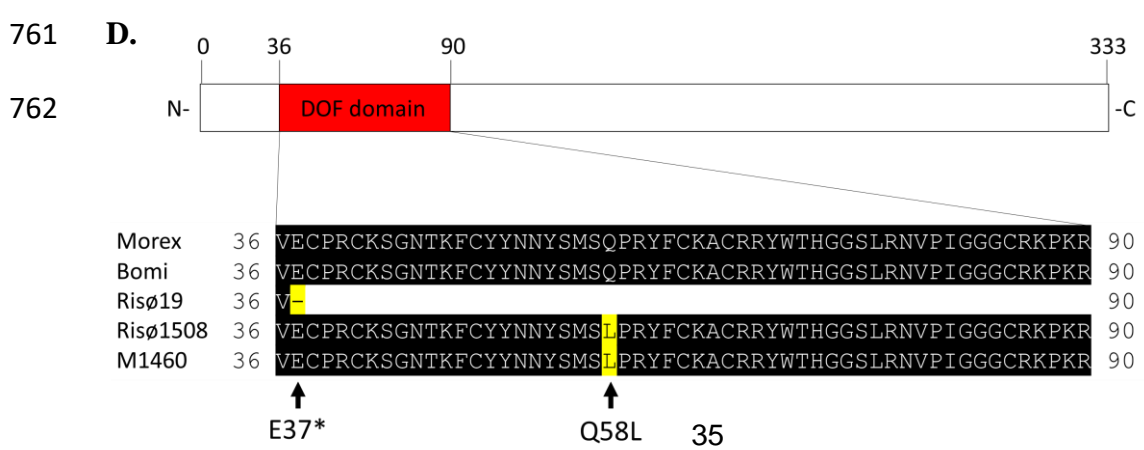

763 **Figure 2.**

764

**A.**

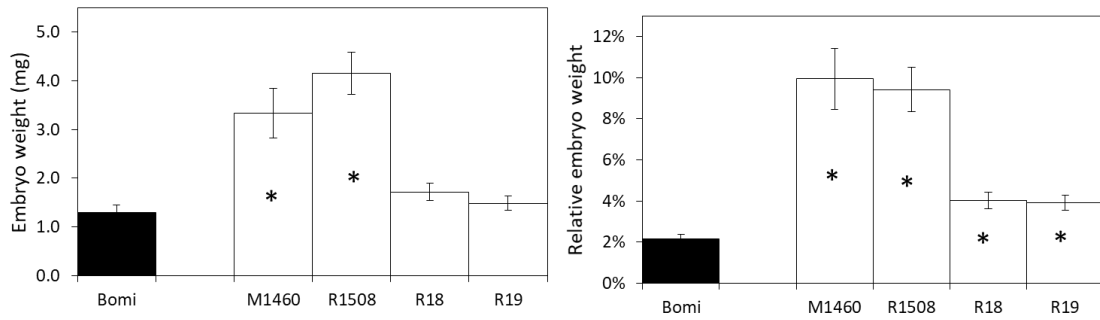

**B.**

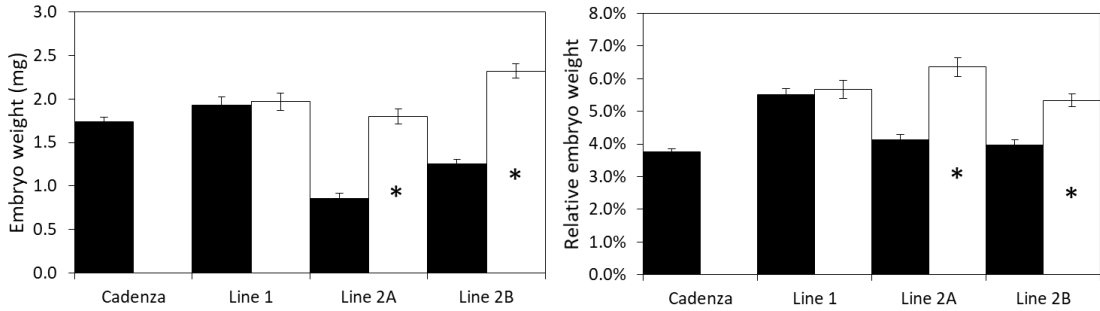

765

**Figure 3.**

766

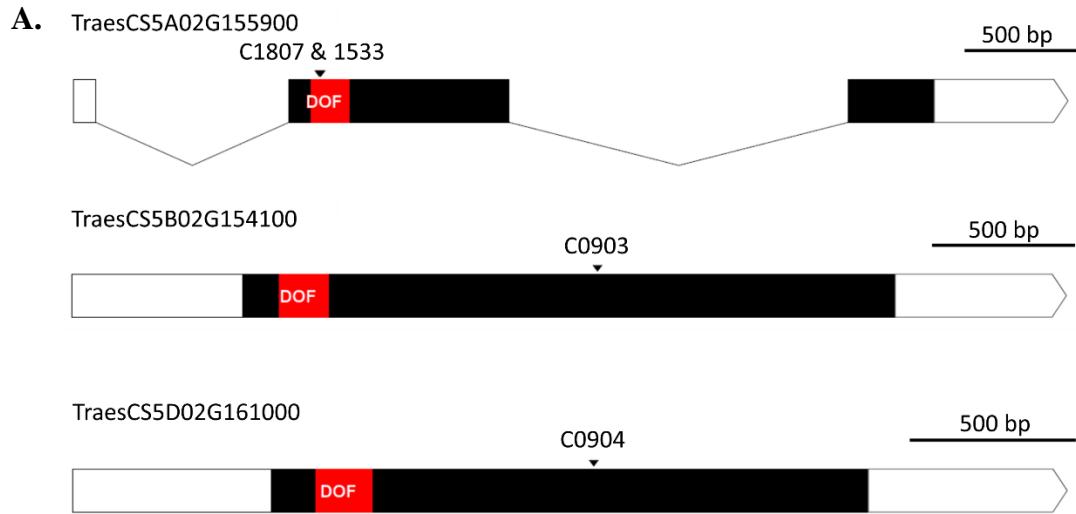

768

769

770

771

772

773

774

**B.**

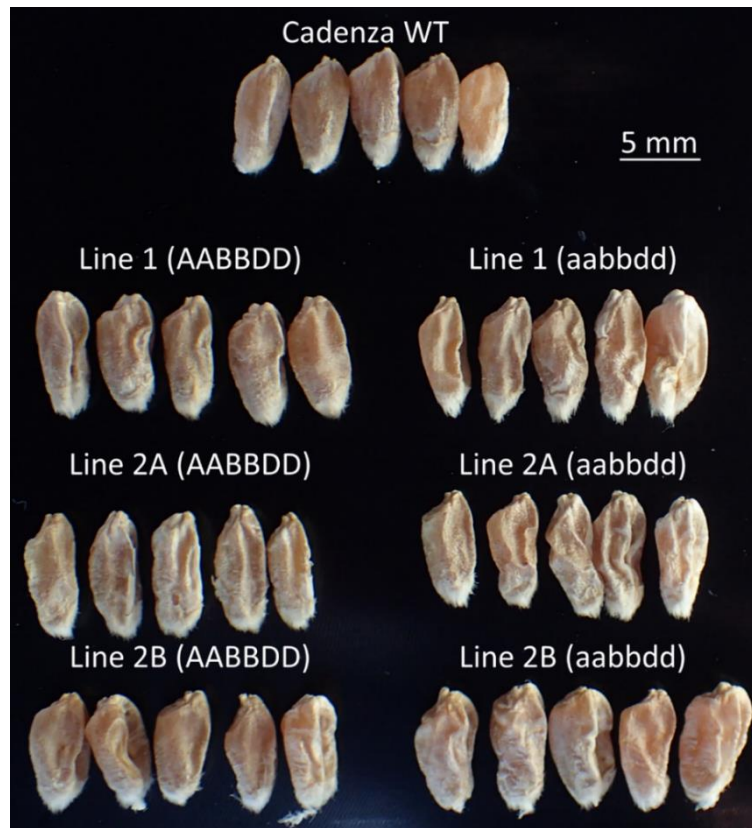

775

776

777

778

779

780

781

782

783

784

785

786

**C.**

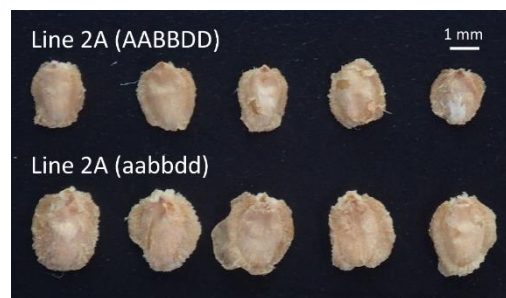

787 **Figure 4.**

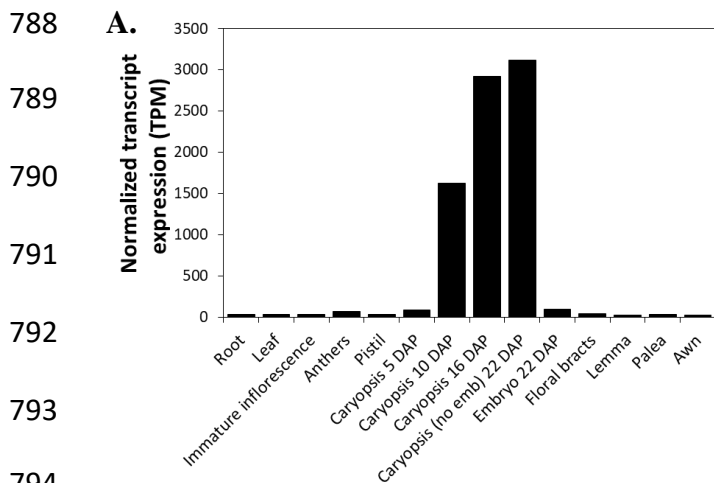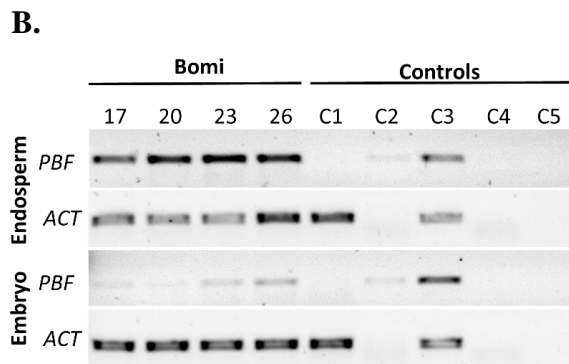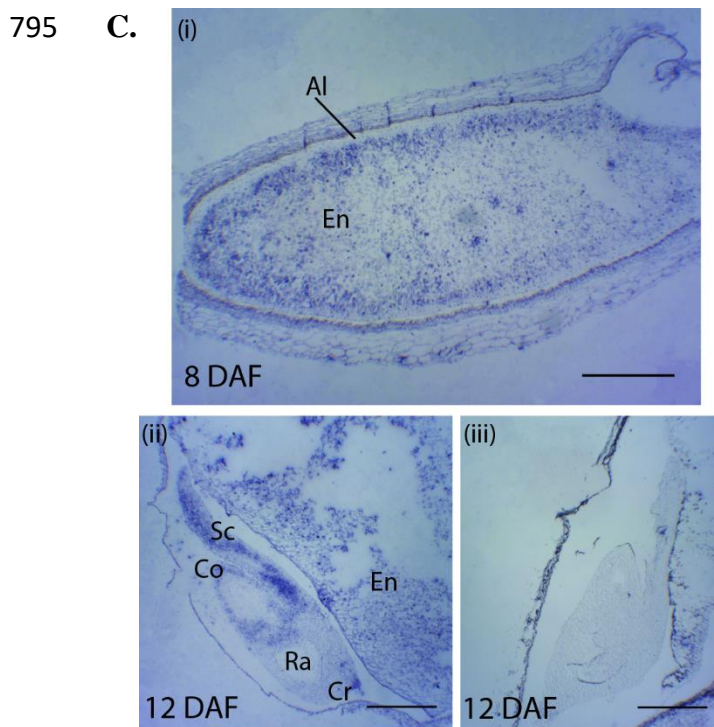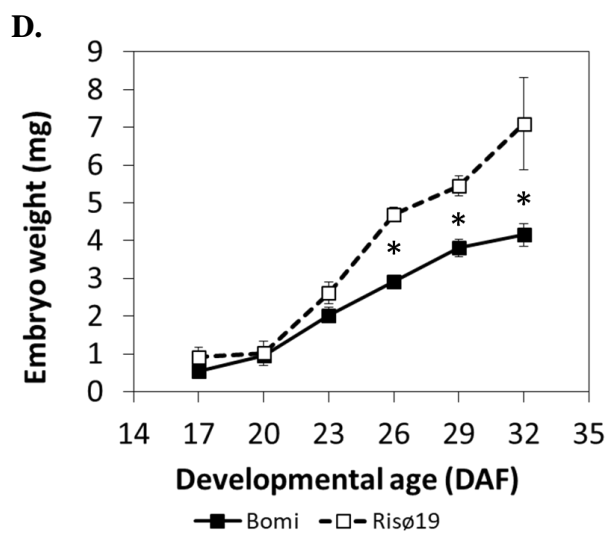

796 **Figure 5. Downstream targets of *PBF* in wheat**  
797

**A**

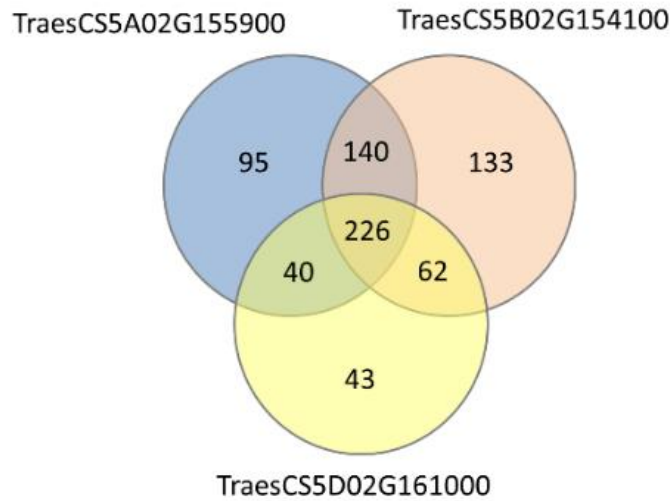

**B**

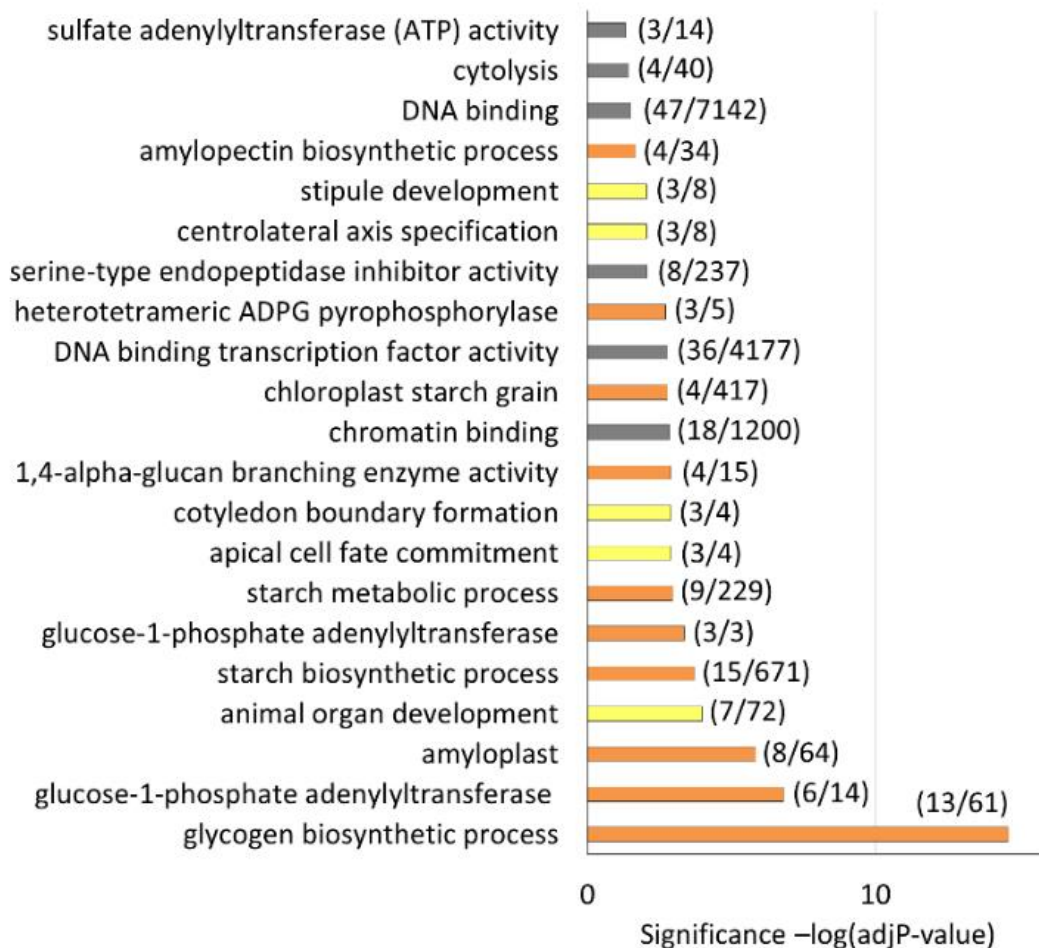



798 **Supplementary Table S1. The *lys3* mutants of barley.**

799 Comparison of the four known *lys3* mutant lines: their origins and the effects of the mutations on *PBF* gene and protein. See also Fig. 1D.

800

| Mutant   | Wild type | Mutagen      | Original selection criteria | Reference                     | Change to cDNA | position | Effect        | Change to protein |
|----------|-----------|--------------|-----------------------------|-------------------------------|----------------|----------|---------------|-------------------|
| Risø18   | Bomi      | Na azide     | Unknown                     | Munck <i>et al.</i> , 1992    | -              | -        | Deletion      | -                 |
| Risø19   | Bomi      | Na azide     | Unknown                     | Munck <i>et al.</i> , 1993    | G/T            | 109      | Nonsense/Stop | E/*               |
| Risø1508 | Bomi      | Ethylenimine | High lysine                 | Tallberg <i>et al.</i> , 1973 | A/T            | 173      | Missense      | Q/L               |
| M1460    | Minerva   | Na azide     | Low $\beta$ -glucan         | Aastrup <i>et al.</i> , 1983  | A/T            | 173      | Missense      | Q/L               |



802 **Supplementary Table S2. Primers and assay conditions.**

803 **A. KASP primers for barley genotyping.**

804 Primers were preceded by the VIC sequence (GAAGGTCGGAGTCAACGGATT) (Morex  
 805 and *LYS3*) or by FAM sequence (GAAGGTGACCAAGTTCATGCT) (Bomi and *lys3*). The  
 806 discriminatory bases are small case. The ratio of FAM/VIC/Common primers used was  
 807 12/12/30, except for the genotyping primers for HORVU5Hr1G048380, which were in the  
 808 ratio 12/6/30. The KASP reaction (in a final volume of 5 µl) contained: 2.5 µl 2xKASP  
 809 reagent, 0.07 µl of primer mix and 2.5 µl of gDNA template (1 ng/µl). The PCR conditions  
 810 were: 94 °C for 15 min, 10 cycles of (94 °C for 20 s, 65 °C for 1 min and -0.8 °C/cycle to 57  
 811 °C), 10 cycles of (94 °C for 20 s, 57 °C for 1 min) and then reprise 5 to 10 cycles of (94 °C  
 812 for 20 s, 57 °C for 1 min). Abbreviated gene names (xxxx) are as in Table 1 (i.e.  
 813 HORVU5Hr1G04xxxx).

| Gene | Morex (5'-3')           | Bomi (5'-3')            | Common (5'-3')         |
|------|-------------------------|-------------------------|------------------------|
| 7540 | TGCCAGTGAGTTTGTCCAGt    | TGCCAGTGAGTTTGTCCAGg    | GACATCCGAGCTCTTTGGAC   |
| 7890 | TCAGACTGAGCGGCCTTGa     | TCAGACTGAGCGGCCTTGc     | TCATCGTGTGCGGTGTCAAAT  |
| 8110 | GTGCTACTGCCTTGGCg       | GTGCTACTGCCTTGCCa       | ATGGACGACACCTGGACAC    |
| 8380 | ATGAGCATTTCATGGTGCAg    | ATGAGCATTTCATGGTGCAc    | AGCTCCTTCCCACATAGCTC   |
| 8630 | ACAGCATCAACACGGCt       | ACAGCATCAACACGGCc       | TCAGCTTCGATCAAGAGTTTG  |
| 8700 | GGATCTACAAGAGTGAAGATCGc | GGATCTACAAGAGTGAAGATCGg | GGTGAGCTTCTTCTTCCTTTGA |
| 8950 | ATCATTGACGCATCGCTAa     | ATCATTGACGCATCGCTAg     | TGGACATGAGTTGCTGGACT   |
| 9180 | TTAATGTCTCATCAAGGCAATGa | TTAATGTCTCATCAAGGCAATGc | GGCACGCCGATAAAAAGAT    |
| 9330 | AGCAGCGCAAGAATAATTTc    | AGCAGCGCAAGAATAATTTt    | GGCGTTGACTGCAACAAGT    |

814

815 **B. Primers used to amplify barley *PBF* genomic sequence.**

816 The PCR reaction (in a final volume of 20 µl) contained: 1 µl of gDNA template (2 ng), 0.5  
 817 µl of 10 mM forward primer, 0.5 µl of 10 mM reverse primer, 0.6 µl of 10 mM dNTPs, 2 µl

818 of 10 x PCR buffer, 0.2 µl of Phusion High-Fidelity DNA Polymerase (Thermo Fisher  
 819 Scientific, UK) and water. The PCR conditions were: 98 °C for 30 s, 35 cycles of (98 °C for  
 820 10 s, 58 °C for 60 s and 72 °C for 20 s) and then 72 °C for 5 min.

| Primer name | Sequence (5'-3')    | Gene             |
|-------------|---------------------|------------------|
| BPBF_F1     | ATGGAGGAAGTGTTCGTC  | HORVU5Hr1G048700 |
| BPBF_R1     | TTACATCAGGGAGGTGCTG | HORVU5Hr1G048700 |

821

#### 822 C. Barley *PBF* (HORVU5Hr1G048700) allele-specific KASP primers.

823 Primers were preceded by the VIC sequence (GAAGGTCGGAGTCAACGGATT) (*lys3*) or  
 824 by FAM sequence (GAAGGTGACCAAGTTCATGCT) (Bomi). The discriminatory bases  
 825 are small case. The ratio of FAM/VIC/Common primers used was 12/12/30. The PCR  
 826 reactions and conditions were as for (A). Note that no primers are given for Risø18 because  
 827 the genomic region containing this allele is deleted.

| Allele   | Wild type (5'-3') | Mutant (5'-3')   | Common (5'-3')        |
|----------|-------------------|------------------|-----------------------|
| Risø1508 | GCAGAAGTAGCGGGCt  | GCAGAAGTAGCGGGCa | CGTCCAACCTCCAAGAGCAAG |
| M1460    | GCAGAAGTAGCGGGCt  | GCAGAAGTAGCGGGCa | CGTCCAACCTCCAAGAGCAAG |
| Risø19   | TGCACCGAGGGCACTc  | TGCACCGAGGGCACTa | CGTCCAACCTCCAAGAGCAAG |
| Risø18   | N/A               | N/A              | N/A                   |

828

#### 829 D. Wheat TILLING mutants and KASP primers.

830 Primers were designed for KASP assays and were preceded by the VIC sequence  
 831 (GAAGGTCGGAGTCAACGGATT) (wild-type) or by FAM sequence  
 832 (GAAGGTGACCAAGTTCATGCT) (mutant). The discriminatory bases are small case. The  
 833 ratio of FAM/VIC/Common primers used was 12:12:15 (Cadenza1807), 6:12:30  
 834 (Cadenza1533) or 12:12:30 (Cadenza0903 and Cadenza0904). The KASP reaction was  
 835 carried out as described by the manufacturer (<https://www.lgcgroup.com>).

| Chr 5 | Mutant ID   | Change to gDNA | position | Effect   | Change to protein | position | Wild type primer                                 | Mutant primer                                | Common primer               |
|-------|-------------|----------------|----------|----------|-------------------|----------|--------------------------------------------------|----------------------------------------------|-----------------------------|
| A     | Cadenza1807 | aCc/aTc        | 137      | Missense | T/I               | 46       | CGGTGC<br>AAGTCT<br>GGCAAC<br>Ac                 | CGGTGCAA<br>GTCTGGCA<br>ACA <sub>t</sub>     | GGCGTCG<br>GAGGTCC<br>CCGG  |
| A     | Cadenza1533 | tTc/tAc        | 143      | Missense | F/Y               | 48       | AGTCTG<br>GCAACA<br>CCAAGT <sub>t</sub>          | AGTCTGGC<br>AACACCAA<br>GT <sub>a</sub>      | GCAGGC<br>CTGCAG<br>AAGTAG  |
| B     | Cadenza0903 | Cag/Tag        | 1844     | Stop     | Q/*               | 182      | CACCAT<br>AGTAGT<br>AGCCAT<br>TGTCT <sub>g</sub> | CACCATAG<br>TAGTAGCC<br>ATTGTCT <sub>a</sub> | GAGGGC<br>TTCTTGA<br>TGGCAA |
| D     | Cadenza0904 | tgG/tgA        | 1574     | Stop     | W/*               | 255      | GTGATG<br>GGGCTC<br>CAATG <sub>g</sub>           | GTGATGG<br>GGCTCCAA<br>TG <sub>a</sub>       | GCCGCTG<br>TCGTTAT<br>TGTTG |

836

### 837 E. Primers for analysis of gene expression by RT-PCR.

838 The RT-PCR reaction (in a final volume of 20 µl) contained: 1 µl of cDNA template, 0.5 µl  
839 of 10 mM forward primer, 0.5 µl of 10 mM reverse primer, 0.6 µl of 10 mM dNTPs, 2 µl of  
840 10 x PCR buffer, 0.2 µl of FastStart *Taq* DNA polymerase (Roche, 04659163103) and water.

841 The PCR conditions were: 95 °C for 3 min, 35 cycles of (95 °C for 30 s, 58 °C for 30 s and  
842 72 °C for 30 s or 1 min) and then 72 °C for 5 min. Reactions were performed in triplicate and  
843 *ACTIN*, a constitutively-expressed gene, was used as a control.

| Primer name    | Sequence (5'-3')       | Gene             |
|----------------|------------------------|------------------|
| <i>BPBF_F1</i> | GTCTCGTGGTTGGTGGAAAT   | HORVU5Hr1G048700 |
| <i>BPBF_R2</i> | TTACATCAGGGAGGTGCTG    | HORVU5Hr1G048700 |
| <i>ACTIN_F</i> | TTCAGTGGTCCCTGCCAATGTA | HORVU1Hr1G047440 |
| <i>ACTIN_R</i> | CCTACCGGCAAGATCAAGAC   | HORVU1Hr1G047440 |

844

### 845 F. Primers for *in situ* expression analysis.

846 *In situ* hybridization was as described previously (Drea, *et al.*, 2005; Opanowicz *et al.*, 2010).

|                               |                                                    |
|-------------------------------|----------------------------------------------------|
| PBF_insitu_F                  | GGGACTGGGAACAATGTGAC                               |
| PBF_insitu_R                  | CCGAGCGAAATACTTCAAGC                               |
| PBF_insitu_RT7<br>(antisense) | GAATTGTAATACGACTCACTATAGGGCCGAGCGAAATAC<br>TTCAAGC |
| PBF_insitu_FT7<br>(sense)     | GGGACTGGGAACAATGTGACGAATTGTAATACGACTCAC<br>TATAGGG |

847

848 **Supplementary Table S3.** WGCNA co-expression analysis.

849 Analysis of co-expression of *PBF* and other large-embryo genes (*GE*, *BIGE1* and *LARGE*

850 *EMBRYO*) (Ramírez-González *et al.*, 2018). The co-expression Module (network) associated

851 with each gene for four different tissues is indicated. NA = not analysed (because the gene is

852 not expressed in this tissue and so was not included in the network).

| Gene type       | Gene ID            | Module |      |      |       |
|-----------------|--------------------|--------|------|------|-------|
|                 |                    | Grain  | Leaf | Root | Spike |
| <i>GE</i>       | TraesCS2A01G175700 | 9      | 0    | 11   | 1     |
|                 | TraesCS2B01G201900 | 2      | 1    | 18   | 1     |
|                 | TraesCS2D01G183000 | 9      | 1    | 18   | 0     |
| <i>Lys3/PBF</i> | TraesCS5A01G155900 | 13     | NA   | NA   | NA    |
|                 | TraesCS5B01G154100 | 13     | NA   | NA   | NA    |
|                 | TraesCS5D01G161000 | 13     | NA   | NA   | NA    |
| <i>LE</i>       | TraesCS4A01G271200 | 0      | 0    | 2    | 0     |
|                 | TraesCS4B01G042900 | 0      | 0    | 2    | 17    |
|                 | TraesCS4D01G040200 | 0      | 0    | 2    | 0     |
| <i>BIGE1</i>    | TraesCS4A01G350200 | 2      | 0    | 7    | 12    |
|                 | TraesCS5B01G522900 | 2      | 0    | 1    | 12    |
|                 | TraesCS5D01G521600 | 2      | 0    | 0    | 0     |

853

854 **Supplementary Table S4. Analysis of the promotor regions of wheat starch-related genes.**

855 A set of wheat genes involved in starch synthesis was selected and their promotor regions (2 kb upstream sequences) were identified in the  
 856 IWGSC RefSeqv1 wheat cv Chinese Spring (CS) genome sequence as part of the WGIN Wheat Promotome Capture project  
 857 (<http://www.wgin.org.uk/>). The presence of *PBF* regulatory motifs (prolamin box, TGTAAG or CTTTACT; pyrimidine box, CCTTTT or  
 858 AAAAGG) in the promotor regions is indicated. Genes predicted by GENIE3 analysis to be down-stream targets of *lys3 PBF* are also indicated  
 859 (see Fig. 5).

860

| Gene function or product                    | Gene designation      | IWGSC gene ID        | Homoeolog present in CS | Prolamin box present | Pyrimidine box present | Predicted target genes of <i>lys3 PBF</i> (GENIE3). |
|---------------------------------------------|-----------------------|----------------------|-------------------------|----------------------|------------------------|-----------------------------------------------------|
| <b>ADPG pyrophosphorylase large subunit</b> | <i>APL1/AGPL3</i>     | TraesCS5A02G472000   | Yes                     | No                   | Yes                    | No                                                  |
|                                             |                       | TraesCS5B02G484700   | Yes                     | No                   | Yes                    | No                                                  |
|                                             |                       | TraesCS5D02G484500   | Yes                     | No                   | Yes                    | No                                                  |
| <b>ADPG pyrophosphorylase large subunit</b> | <i>APL3/AGPL1</i>     | TraesCS1A02G419600   | Yes                     | Yes                  | Yes                    | Yes                                                 |
|                                             |                       | TraesCS1B02G449700   | Yes                     | Yes                  | Yes                    | Yes                                                 |
|                                             |                       | TraesCS1D02G427400   | Yes                     | Yes                  | Yes                    | Yes                                                 |
| <b>ADPG pyrophosphorylase small subunit</b> | <i>APS2/AGPS2</i>     | TraesCS5A02G292900LC | Yes                     | No                   | Yes                    | No                                                  |
|                                             |                       | TraesCS5B02G175800   | Yes                     | No                   | Yes                    | No                                                  |
|                                             |                       | TraesCS5D02G182600   | Yes                     | No                   | No                     | No                                                  |
| <b>ADPG pyrophosphorylase small subunit</b> | <i>APS1/AGPS1/Bt2</i> | TraesCS7A02G287400   | Yes                     | Yes                  | Yes                    | Yes                                                 |
|                                             |                       | TraesCS7B02G183300   | Yes                     | No                   | Yes                    | Yes                                                 |
|                                             |                       | TraesCS7D02G284900   | Yes                     | No                   | Yes                    | Yes                                                 |
| <b>Disproportionating enzyme I</b>          | <i>DPE1</i>           | TraesCS2A02G159300   | Yes                     | No                   | Yes                    | No                                                  |
|                                             |                       | TraesCS2B02G184900   | Yes                     | No                   | Yes                    | No                                                  |
|                                             |                       | TraesCS2D02G166600   | Yes                     | No                   | Yes                    | No                                                  |
| <b>Disproportionating enzyme II</b>         | <i>DPE2</i>           | TraesCS2A02G123800   | Yes                     | No                   | Yes                    | No                                                  |
|                                             |                       | TraesCS2B02G145700   | Yes                     | No                   | Yes                    | No                                                  |
|                                             |                       | TraesCS2D02G126600   | Yes                     | No                   | Yes                    | No                                                  |

|                                         |                   |                    |     |     |     |     |
|-----------------------------------------|-------------------|--------------------|-----|-----|-----|-----|
| <b>Floury endosperm6</b>                | <i>FLO6</i>       | TraesCS4A02G284000 | Yes | No  | No  | No  |
|                                         |                   | TraesCS4B02G029700 | Yes | No  | Yes | No  |
|                                         |                   | TraesCS4D02G026700 | Yes | No  | Yes | No  |
| <b>Granule-bound starch synthase I</b>  | <i>GBSSI/waxy</i> | TraesCS7A02G070100 | Yes | No  | Yes | Yes |
|                                         |                   | TraesCS7D02G064300 | No  | No  | No  | Yes |
|                                         |                   |                    | Yes | No  | Yes | No  |
| <b>Granule-bound starch synthase II</b> | <i>GBSSII</i>     | TraesCS2A02G373600 | Yes | No  | Yes | No  |
|                                         |                   | TraesCS2B02G390700 | Yes | Yes | Yes | No  |
|                                         |                   | TraesCS2D02G369800 | Yes | No  | Yes | No  |
| <b>Isoamylase I</b>                     | <i>ISA1</i>       | TraesCS7A02G251400 | Yes | No  | Yes | Yes |
|                                         |                   | TraesCS7B02G139700 | Yes | No  | Yes | Yes |
|                                         |                   | TraesCS7D02G249500 | Yes | No  | Yes | Yes |
| <b>Isoamylase II</b>                    | <i>ISA2</i>       | TraesCS1A02G247100 | Yes | No  | Yes | No  |
|                                         |                   | TraesCS1B02G257700 | Yes | Yes | Yes | No  |
|                                         |                   | TraesCS1D02G246300 | Yes | No  | Yes | No  |
| <b>Isoamylase III</b>                   | <i>ISA3</i>       | TraesCS5A02G248700 | Yes | No  | Yes | No  |
|                                         |                   | TraesCS5B02G246400 | Yes | No  | Yes | No  |
|                                         |                   | TraesCS5D02G255800 | Yes | No  | Yes | No  |
| <b>Limit dextrinase</b>                 | <i>PUL</i>        | TraesCS7A02G133500 | Yes | Yes | Yes | Yes |
|                                         |                   | TraesCS7B02G034600 | Yes | No  | Yes | Yes |
|                                         |                   | TraesCS7D02G133100 | Yes | No  | Yes | Yes |
| <b>Maltose transporter</b>              | <i>MT</i>         | TraesCS2A02G436000 | Yes | No  | Yes | No  |
|                                         |                   | TraesCS2B02G457100 | Yes | No  | Yes | No  |
|                                         |                   | TraesCS2D02G433900 | Yes | No  | Yes | No  |
| <b>Plastidial ADPG transporter</b>      | <i>OsBT1-1</i>    | TraesCS6A02G175100 | Yes | No  | Yes | Yes |
|                                         |                   | TraesCS6B02G210000 | Yes | No  | Yes | Yes |
|                                         |                   | TraesCS6D02G168200 | Yes | No  | Yes | Yes |
| <b>Starch branching enzyme I</b>        | <i>BEI</i>        | TraesCS7A02G549300 | Yes | No  | Yes | Yes |
|                                         |                   | TraesCS7B02G472300 | Yes | No  | Yes | Yes |
|                                         |                   | TraesCS7D02G535600 | Yes | No  | Yes | Yes |
| <b>Starch branching enzyme IIa</b>      | <i>BEIIa</i>      | TraesCS2A02G293400 | Yes | No  | Yes | No  |
|                                         |                   | TraesCS2B02G309500 | Yes | No  | Yes | No  |
|                                         |                   | TraesCS2D02G290800 | Yes | Yes | Yes | No  |
| <b>Starch branching enzyme IIb</b>      | <i>BEIIb/Ae</i>   | TraesCS2A02G310300 | Yes | No  | Yes | Yes |
|                                         |                   | TraesCS2B02G327300 | Yes | No  | Yes | Yes |
|                                         |                   | TraesCS2D02G308600 | Yes | No  | Yes | Yes |

|                                          |                        |                    |     |     |     |     |
|------------------------------------------|------------------------|--------------------|-----|-----|-----|-----|
| <b>Starch phosphorylase (cytosol)</b>    | <i>PHOH</i>            | TraesCS3A02G366300 | Yes | No  | Yes | No  |
|                                          |                        | TraesCS3B02G397900 | Yes | No  | Yes | No  |
|                                          |                        | TraesCS3D02G359200 | Yes | No  | Yes | No  |
| <b>Starch phosphorylase (plastidial)</b> | <i>PHOL</i>            | TraesCS5A02G395200 | Yes | Yes | Yes | Yes |
|                                          |                        | TraesCS5B02G400000 | Yes | No  | Yes | Yes |
|                                          |                        | TraesCS5D02G404500 | Yes | Yes | Yes | No  |
| <b>Starch synthase I</b>                 | <i>SSI<sup>c</sup></i> | TraesCS7A02G120300 | Yes | No  | No  | No  |
|                                          |                        | TraesCS7B02G018600 | Yes | No  | No  | No  |
|                                          |                        | TraesCS7D02G117800 | Yes | No  | Yes | Yes |
| <b>Starch synthase IIa</b>               | <i>SSIIa/SSII-3</i>    | TraesCS7A02G189000 | Yes | No  | Yes | No  |
|                                          |                        | TraesCS7B02G093800 | Yes | Yes | Yes | No  |
|                                          |                        | TraesCS7D02G190100 | Yes | Yes | No  | No  |
| <b>Starch synthase IIb</b>               | <i>SSIIb/SSII-2</i>    | TraesCS6A02G307800 | Yes | No  | Yes | No  |
|                                          |                        | TraesCS6B02G336400 | Yes | No  | Yes | No  |
|                                          |                        | TraesCS6D02G287000 | Yes | No  | Yes | No  |
| <b>Starch synthase IIc</b>               | <i>SSIIc/SSII-1</i>    | TraesCS1A02G137200 | Yes | No  | Yes | No  |
|                                          |                        | TraesCS1B02G155700 | Yes | No  | Yes | No  |
|                                          |                        | TraesCS1D02G138100 | Yes | No  | Yes | No  |
| <b>Starch synthase IIIa</b>              | <i>SSIIIa/SSIII-2</i>  | TraesCS1A02G091500 | Yes | No  | Yes | Yes |
|                                          |                        | TraesCS1B02G119300 | Yes | No  | Yes | Yes |
|                                          |                        |                    | Yes | No  | No  | No  |
| <b>Starch synthase IIIb</b>              | <i>SSIIIb/SSIII-1</i>  | TraesCS2A02G468800 | Yes | Yes | Yes | No  |
|                                          |                        | TraesCS2B02G491700 | Yes | No  | Yes | No  |
|                                          |                        | TraesCS2D02G468900 | Yes | Yes | Yes | No  |
| <b>Starch synthase IV</b>                | <i>SSIVa/SSIV-1</i>    | TraesCS1A02G353300 | Yes | No  | Yes | No  |
|                                          |                        | TraesCS1B02G368500 | Yes | No  | Yes | No  |
|                                          |                        | TraesCS1D02G356900 | Yes | Yes | Yes | No  |

862 **Supplementary Figure S1. Comparison of the *PBF* alleles in all four *lys3* mutant lines.**

863 Barley *PBF* genomic sequences were amplified by PCR and amplicons were separated by  
864 electrophoresis. M = molecular weight ladder (Bioline Ladder 1 kbp). The size of the wild  
865 type *PBF* amplicon is indicated.

866

867

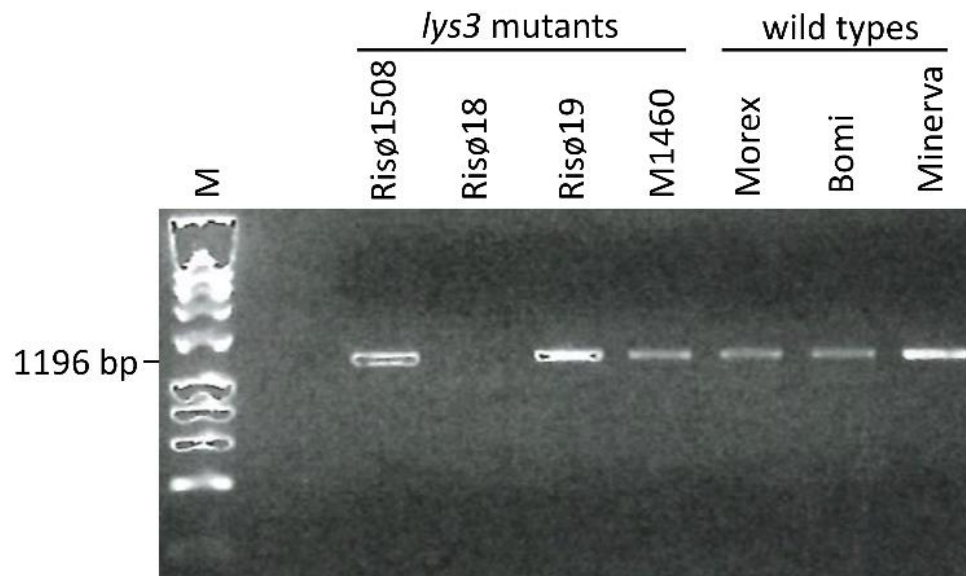



868 **Supplementary Figure S2. Predicted downstream targets of *PBF* in wheat.**

869 GENIE3 analysis of 850 wheat RNASeq samples revealed putative downstream targets of  
870 *PBF* (Fig. S2). The gene ontologies (GOs) were reduced and visualized using enrichment  
871 analysis (<http://revigo.irb.hr/revigo.jsp>; Ramírez-González *et al.*, 2018). Bubble colour  
872 indicates p-value and bubble size the frequency of the GO term in the GO database. Highly  
873 similar GO terms are linked by edges in the graph.

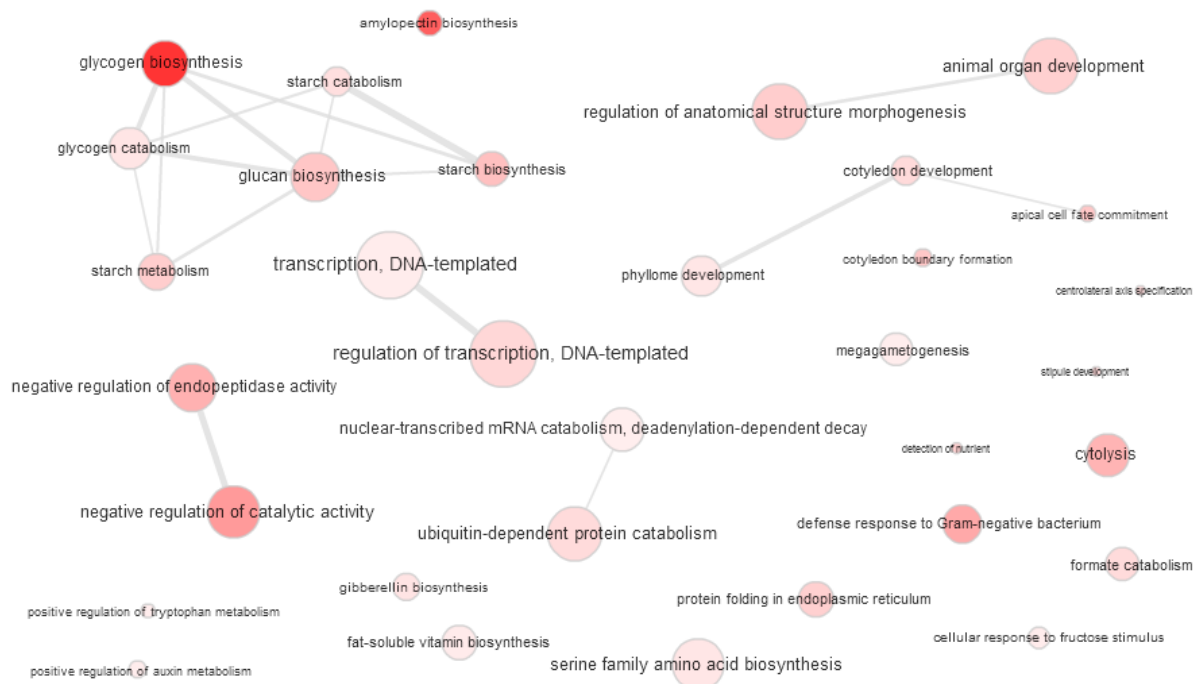

Source: https://www.biorxiv.org/content/10.1101/2019.12.18.880955v1.full.pdf
